# Supplementary material for: Improving quality and safety in nursing homes and home care: the study protocol of a mixed-methods research design to implement a leadership intervention
Source: PubMed Central journal article supplement — BMJ Open. 2018 Mar 28;8(3):e020933. doi: 10.1136/bmjopen-2017-020933 (PMC5875614; doi:10.1136/bmjopen-2017-020933), 2018-03-28
Supplement: bmjopen-2017-020933.draft_revisions.pdf [file bmjopen-2017-020933.draft_revisions.pdf]

# BMJ Open

BMJ Open is committed to open peer review. As part of this commitment we make the peer review history of every article we publish publicly available.

When an article is published we post the peer reviewers' comments and the authors' responses online. We also post the versions of the paper that were used during peer review. These are the versions that the peer review comments apply to.

The versions of the paper that follow are the versions that were submitted during the peer review process. They are not the versions of record or the final published versions. They should not be cited or distributed as the published version of this manuscript.

BMJ Open is an open access journal and the full, final, typeset and author-corrected version of record of the manuscript is available on our site with no access controls, subscription charges or pay-per-view fees (<http://bmjopen.bmj.com>).

If you have any questions on BMJ Open's open peer review process please email [info.bmjopen@bmj.com](mailto:info.bmjopen@bmj.com)

# BMJ Open

## Improving Quality and Safety in Nursing Homes and Home Care: The study protocol of a mixed methods research design to implement a leadership intervention

|                               |                                                                                                                                                                                                                                                                                                                                                                                                                                                                                                                                                                                                                                                                                                                                                                                                                                                                                                                         |
|-------------------------------|-------------------------------------------------------------------------------------------------------------------------------------------------------------------------------------------------------------------------------------------------------------------------------------------------------------------------------------------------------------------------------------------------------------------------------------------------------------------------------------------------------------------------------------------------------------------------------------------------------------------------------------------------------------------------------------------------------------------------------------------------------------------------------------------------------------------------------------------------------------------------------------------------------------------------|
| Journal:                      | <i>BMJ Open</i>                                                                                                                                                                                                                                                                                                                                                                                                                                                                                                                                                                                                                                                                                                                                                                                                                                                                                                         |
| Manuscript ID                 | bmjopen-2017-020933                                                                                                                                                                                                                                                                                                                                                                                                                                                                                                                                                                                                                                                                                                                                                                                                                                                                                                     |
| Article Type:                 | Protocol                                                                                                                                                                                                                                                                                                                                                                                                                                                                                                                                                                                                                                                                                                                                                                                                                                                                                                                |
| Date Submitted by the Author: | 04-Dec-2017                                                                                                                                                                                                                                                                                                                                                                                                                                                                                                                                                                                                                                                                                                                                                                                                                                                                                                             |
| Complete List of Authors:     | <p>Wiig, Siri; University of Stavanger, Faculty of Health Sciences<br/>         Ree, Eline ; University of Stavanger, Faculty of Health Sciences<br/>         Johannessen, Terese ; Univerity of Stavanger , Faculty of Health Sciences<br/>         Strømme, Torunn; University of Stavanger, Faculty of Health Sciences<br/>         Storm, Marianne; University of Stavanger, Faculty of Health Sciences<br/>         Aase, Ingunn; University of Stavanger, Faculty of Health Sciences<br/>         Ullebust, Berit; Førde municipality<br/>         Holen-Rabbersvik, Elisabeth; Songdalen Kommune<br/>         Hurup Thomsen, Line; Stavanger Kommune<br/>         Sandvik Pedersen, Anne<br/>         van de Bovenkamp, Hester; Erasmus University<br/>         Bal, Roland; Erasmus University, Health Policy and Management<br/>         Aase, Karina; University of Stavanger, Faculty of Health Sciences</p> |
| Keywords:                     | quality, patient safety, PRIMARY CARE, leadership, intervention, context                                                                                                                                                                                                                                                                                                                                                                                                                                                                                                                                                                                                                                                                                                                                                                                                                                                |
|                               |                                                                                                                                                                                                                                                                                                                                                                                                                                                                                                                                                                                                                                                                                                                                                                                                                                                                                                                         |

SCHOLARONE™  
Manuscripts

Only

1  
2  
3 **Improving Quality and Safety in Nursing Homes and Home Care: The study**  
4  
5 **protocol of a mixed methods research design to implement a leadership**  
6  
7 **intervention**  
8  
9

10  
11  
12  
13  
14 Siri Wiig\* (SW), Faculty of Health Sciences, University of Stavanger, Stavanger, Norway

15  
16  
17 Eline Ree (ER), Faculty of Health Sciences, University of Stavanger, Stavanger, Norway

18  
19  
20 Terese Johannessen (TJ), Faculty of Health Sciences, University of Stavanger, Stavanger, Norway

21  
22  
23 Torunn Strømme (TS), Faculty of Health Sciences, University of Stavanger, Stavanger, Norway

24  
25  
26 Marianne Storm (MS), Faculty of Health Sciences, University of Stavanger, Stavanger, Norway

27  
28  
29 Ingunn Aase (IAa), Faculty of Health Sciences, University of Stavanger, Stavanger, Norway

30  
31  
32 Berit Ullebust (BU), Førde municipality, Førde, Norway

33  
34  
35 Elisabeth Holen-Rabbersvik (EHR), Faculty of Health Sciences, University of Stavanger, Stavanger,  
36 Norway; Department of Health and Nursing Sciences, University of Agder, Kristiansand, Norway.

37  
38  
39 Line Hurup Thomsen (LHT), Stavanger municipality, Stavanger, Norway

40  
41  
42 Anne Torhild Sandvik Pedersen (ATSP), next-of-kin representative, Stavanger, Norway

43  
44  
45 Hester van de Bovenkamp (HvB), Erasmus University, Rotterdam, the Netherlands

46  
47  
48 Roland Bal (RB), Erasmus University, Rotterdam, the Netherlands

49  
50  
51 Karina Aase (KAa), Faculty of Health Sciences, University of Stavanger, Stavanger, Norway

52  
53  
54 \*Siri Wiig, N-4036 Stavanger, Norway, email: [siri.wiig@uis.no](mailto:siri.wiig@uis.no), telephone: 0047-51834288

1  
2  
3 Word count, excluding references: 4431  
4  
5  
6  
7

## 8 **ABSTRACT**

9

### 10 **Introduction**

11  
12  
13 Primary care services such as nursing homes and home care face challenges across different  
14 countries as people are living longer, often with chronic conditions. There is a lack of knowledge  
15 regarding implementation and impact of quality and safety interventions as most research evidence  
16 so far is generated in hospitals. Additionally, there is a lack of effective leadership tools for quality  
17 and safety improvement work in primary care.  
18  
19  
20  
21  
22  
23

### 24 **Methods and analysis**

25

26  
27 The aim of the SAFE-LEAD Primary Care project is to develop and evaluate a research-based  
28 leadership guide for managers to increase quality and safety competence. The project applies a  
29 mixed-methods design and explores the implications of the leadership guide on managers' and staffs'  
30 knowledge, attitudes, and practices. Four nursing homes and four home care services from different  
31 Norwegian municipalities will participate in the intervention. Surveys, process evaluation (interviews,  
32 observations) and document analyses will be conducted to evaluate the implementation and impact  
33 of the leadership intervention. A comparative study of Norway and the Netherlands will establish  
34 knowledge of the context-dependency of the intervention.  
35  
36  
37  
38  
39  
40  
41  
42  
43  
44

### 45 **Ethics and dissemination**

46

47 The study is approved by the Norwegian Centre for Research Data (2017/52324 and 54855). The  
48 results will be disseminated through scientific articles, two PhD dissertations, an anthology,  
49 presentations at national and international conferences, and in social media, newsletters, and in the  
50 press. The results will generate knowledge to inform leadership practices in nursing homes and home  
51  
52  
53  
54  
55  
56  
57  
58  
59  
60

1  
2  
3 care. Moreover, the study will build new theory on leadership interventions and the role of  
4  
5 contextual factors in nursing homes and home care.

6  
7 **KEYWORDS:** quality, safety, primary care, nursing home, home care, leadership, intervention,  
8  
9 context

## 10 11 12 **STRENGTHS AND LIMITATIONS OF THIS STUDY**

- 13  
14  
15 • The study translates EU research findings from the QUASER project into practice by  
16  
17 implementing a leadership-focused quality and safety improvement intervention in  
18  
19 Norwegian nursing homes and home care.
- 20  
21  
22 • A key strength of the SAFE-LEAD Primary Care study is user involvement in all phases,  
23  
24 including co-researchers representing patients, next-of-kin, a patient and user  
25  
26 ombudsman, and managers in primary care.
- 27  
28  
29 • A mixed-methods design involving a contrasting case study approach enables the  
30  
31 SAFE-LEAD Primary Care study to explore the role of context when implementing a  
32  
33 leadership intervention in nursing homes and home care services located in large,  
34  
35 small, rural and urban municipalities.

## 36 37 38 **INTRODUCTION**

### 39 40 41 **Quality and safety challenges in primary care**

42  
43  
44 Primary care services such as nursing homes and home care face challenges worldwide as people live  
45  
46 longer, often with one or more chronic conditions that should be treated as conservatively as  
47  
48 possible<sup>1</sup>. Most of the research on quality and safety in healthcare is conducted in hospital contexts  
49  
50 so we know little about other healthcare settings<sup>2</sup>. Numerous quality and safety challenges exist in  
51  
52 the nursing home and home care contexts. For example, safety in home care is inseparable from  
53  
54 relationships and interactions between patients, informal caregivers and formal healthcare providers  
55  
56  
57  
58  
59  
60

1  
2  
3<sup>3-6</sup>. In addition, minor mistakes, discontinuity, and multiple care providers with little overview of  
4  
5 patient status and development may cause cumulative negative effects over time. This cumulative  
6  
7 effect is especially important when we consider quality and safety at home and in the community<sup>1</sup>. In  
8  
9 this context, the role of organizational structures and processes is under-researched, and there is a  
10  
11 need for more knowledge on the ways in which organizational and provider factors combine to affect  
12  
13 quality and safety<sup>2,7</sup>.  
14  
15

### 16 **The role of management and leadership**

17  
18 In recent work, Mintzberg<sup>8</sup> focuses on the importance of leadership in healthcare management, as  
19  
20 the two have often been separated. Management involvement and a wide range of leadership roles  
21  
22 and activities are crucial in the development of structures and cultures to improve patient safety and  
23  
24 achieve sustained quality in healthcare services<sup>2,9-14</sup>. Although quality and safety improvement work  
25  
26 in healthcare is predicated on interaction and collaboration among many organizational stakeholders  
27  
28<sup>11,15</sup>, the onus is on healthcare managers to commit to improvement efforts and use research-based  
29  
30 knowledge in planning and improving quality and safety work<sup>16-18</sup>. Involving managers in properly  
31  
32 designed implementation programs has been found to have a positive impact on organizational  
33  
34 outcomes<sup>19</sup>, especially if the programs are comprehensive and systematically integrated into the  
35  
36 organizational culture<sup>20</sup>. As such, there is ongoing demand for more and better knowledge about  
37  
38 quality and safety improvement work focused on the abilities and capacities of managers<sup>13</sup>. Of  
39  
40 particular concern is strengthening leadership capacity, competence, and quality and safety in  
41  
42 nursing homes and home care services.  
43  
44  
45  
46

### 47 **Understanding the role of context in knowledge translation**

48  
49 Translating research-based knowledge into practice in healthcare is challenging<sup>21,22</sup>. One of the key  
50  
51 challenges for management teams is how to implement evidence-based knowledge to facilitate  
52  
53 quality and safety improvement at the local service level<sup>15,23</sup>. Many knowledge translation  
54  
55 frameworks have been proposed that acknowledge the socially situated nature of knowledge  
56  
57  
58  
59  
60

1  
2  
3 implementation practices<sup>22-24-26</sup>. Nevertheless, the literature says little about the influence of context  
4  
5 on successful quality and safety implementation interventions in healthcare<sup>23 27-30</sup>. Context can refer  
6  
7 to both the inner (internal) and outer (external) settings of an organization. Internal organizational  
8  
9 factors include structural characteristics (e.g., location and size); the local workings of teams and  
10  
11 leadership; and the organizational culture and implementation climate. Among the external factors  
12  
13 are applicable laws, regulatory requirements, external policies and incentives, and funding  
14  
15 structures<sup>29</sup>. Differences in internal and external organizational contexts are thought to be  
16  
17 responsible for some of the variability seen in the implementation of quality and safety improvement  
18  
19 efforts in diverse local practice settings<sup>28 29</sup>. However, there are few if any studies of the role of  
20  
21 contextual factors in leadership interventions in primary care settings.  
22

### 23 24 **Organization and quality and safety status of primary care in Norway**

25  
26  
27 Although the organization and responsibilities of healthcare systems can differ, the primary care  
28  
29 setting is an important arena for the provision of health and social care services in Norway as in many  
30  
31 other countries. In Norway, the delivery of primary care services is the responsibility of the  
32  
33 municipalities, which provide most of the country's home care and nursing home services. The  
34  
35 Norwegian municipalities are by law required to work to improve healthcare quality and safety, and  
36  
37 managers at all service levels are responsible for the planning, implementation, evaluation and  
38  
39 systematic improvement of service quality and safety.  
40

41  
42  
43 However, as noted in a recent government white paper on Norwegian primary care services, quality  
44  
45 and safety efforts in municipal health services to date have been insufficient<sup>31</sup>. Inspections made by  
46  
47 the Norwegian Board of Health Supervision have repeatedly found inadequate quality assurance and  
48  
49 control measures across primary care organizations. While quality improvement and safety efforts  
50  
51 should be a top priority of municipal management teams, quality and safety work is often poorly  
52  
53 rooted in management, and in some places not considered a management task at all<sup>32</sup>. Where quality  
54  
55 and safety improvement work has been undertaken, there have been challenges in translating  
56  
57  
58  
59

1  
2  
3 knowledge into practice<sup>31</sup>. Such reports have led to the conclusion that there is a serious lack of basic  
4  
5 leadership competencies related to quality and safety improvement work in Norwegian primary care  
6  
7 services. The latter constitutes the major rationale for conducting the SAFE-LEAD Primary Care study.  
8

### 9 10 **Aims and research questions**

11  
12 The SAFE-LEAD Primary Care study is translating research findings from the EU FP7 funded project  
13  
14 QUASER into practice in Norway by implementing a leadership-focused quality and safety  
15  
16 improvement intervention in the primary care setting. The intervention is built around the  
17  
18 implementation of a quality and safety improvement tool, which is a leadership guide for managers  
19  
20 in nursing homes and home care. The leadership guide is based on the results from the QUASER  
21  
22 study<sup>33</sup> where the consortium, including SAFE-LEAD partners, developed the *QUASER Hospital Guide -*  
23  
24 *A research-based tool to reflect on and develop your quality improvement strategies*<sup>34</sup>. The QUASER  
25  
26 Hospital Guide defines quality as care that is clinically effective, safe, and patient-centred. The guide  
27  
28 is structured around eight quality challenges (structure, culture, leadership, politics, education,  
29  
30 emotions, physical and technical issues, external demands). A short series of questions will stimulate  
31  
32 reflection, accompanied by a decision-aid menu of potential options, with empirical examples of  
33  
34 possible quality and safety improvement solutions across the macro, meso, and micro system levels.  
35  
36 The guide is designed to facilitate patient safety and quality improvement in clinical practice and  
37  
38 service delivery, by providing a systematic means for managers to pinpoint the strengths and  
39  
40 weaknesses of their improvement strategies and reflect on what the tailored measures needed in  
41  
42 their institution and context.  
43  
44

45  
46  
47 The SAFE-LEAD Primary Care study will investigate how and to what extent different contextual  
48  
49 factors influence the implementation process and the effectiveness of such a research-based guide in  
50  
51 a variety of nursing homes and home care services. The aim of the study is to build leadership  
52  
53 competence and guide primary care managers in their efforts to advance and improve vital quality  
54  
55  
56  
57  
58  
59  
60



1  
2  
3 and safety strategies, attitudes and practices in their organizations. The specific objectives of the  
4  
5 SAFE-LEAD Primary Care study are to:

- 6  
7  
8 a) Investigate the influence of context on the implementation of a research-based quality and  
9  
10 safety leadership intervention in primary care  
11  
12 b) Test the effectiveness of the leadership intervention on changes in managers' and healthcare  
13  
14 professionals' knowledge, attitudes and practices relating to quality and safety in primary care  
15  
16 c) Develop theory to guide implementation of future leadership interventions designed to improve  
17  
18 the quality and safety in primary care  
19

20  
21 The following research questions will guide the SAFE-LEAD Primary Care study:

- 22  
23  
24 1. What are the key contextual factors that affect quality and safety improvement work in the  
25  
26 Norwegian primary care setting?  
27  
28 2. How can the SAFE-LEAD Primary Care intervention best be designed to implement use of a  
29  
30 leadership guide in primary care?  
31  
32 3. Which contextual factors, including leadership practices and processes influence successful  
33  
34 implementation and use of a leadership guide in primary care?  
35  
36 4. How can patient and next-of-kin involvement be integrated into use of a leadership guide and  
37  
38 the overall SAFE-LEAD Primary Care intervention?  
39  
40 5. What is the impact of the SAFE-LEAD Primary Care intervention on managers' and staffs' quality  
41  
42 and safety knowledge, attitudes, and practice?  
43  
44 6. What are the implications of the SAFE-LEAD Primary Care research findings on the development  
45  
46 of theoretical frameworks for organizational context, leadership processes, and quality and  
47  
48 safety improvement efforts in primary care settings?  
49  
50 7. What are the similarities and differences in contextual factors determining successful  
51  
52 implementation of research-based quality and safety improvement tools in Norway and the  
53  
54 Netherlands?  
55  
56  
57  
58  
59  
60

- 1  
2  
3 8. How and to what extent do the identified key contextual factors explain implementation, uptake,  
4 and impact of the SAFE-LEAD Primary Care intervention across nursing homes and home care  
5 services?  
6  
7  
8

## 9 10 **METHODOLOGY**

### 11 12 **Design**

13  
14  
15 The SAFE-LEAD Primary Care study (2016-2021) applies a convergent parallel mixed-methods  
16 design<sup>35</sup>. We will collect both quantitative and qualitative data in parallel, analyse them separately  
17 and compare results subsequently<sup>35</sup>.  
18  
19  
20  
21

### 22 23 **Setting**

24  
25 The main study setting is nursing homes and home care in the Norwegian primary care system. In  
26 addition, a small-scale study will take place in a nursing home and a home care institution in the  
27 Netherlands.  
28  
29  
30  
31

### 32 33 **Study sample and recruitment**

34  
35 Four nursing homes and four home care services from different Norwegian municipalities will be  
36 recruited to participate in the SAFE-LEAD Primary Care intervention. To understand the role of  
37 context, the sampling strategy is based on a contrasting case approach<sup>36</sup>, with selection criteria  
38 focusing on diversity in size, geography, and variation between urban and rural services. A similar  
39 small-scale study of one nursing home and one home care service will be conducted in the Dutch  
40 healthcare setting, allowing for comparison of two countries with different national healthcare and  
41 regulatory systems. The recruitment of Norwegian institutions will be conducted in collaboration  
42 with two Centres for Development of Institutional and Home Care Services (Rogaland County, Sogn  
43 and Fjordane County) and the municipality of Songdalen in Vest-Agder County. The Dutch research  
44 team will recruit the institutions in the Netherlands.  
45  
46  
47  
48  
49  
50  
51  
52  
53  
54  
55  
56  
57  
58  
59  
60

### Data collection methods and sources

The study is structured around five work packages indicating distinct phases of the project. In the following, we describe the phases, data collection and sources.

#### Phase 1: Guide development, pilot test, and contextual mapping tool (WP1)

In phase 1, we will develop the quality and safety improvement tool – the SAFE-LEAD guide – to be used in the SAFE-LEAD Primary Care intervention. This includes translation and adaptation of the QUASER Hospital Guide into Norwegian in a process involving the research team in several iterations with professional translation services, co-researchers, future users, and patient and next-of-kin representatives. The original QUASER-guide is based on empirical findings from the hospital setting and the SAFE-LEAD Primary Care project will develop a version adapted to the Norwegian primary care setting focusing on nursing homes and home care. This development process will consist of internal workshops with the multidisciplinary research team with competence in nursing, homecare, nursing homes, quality and safety, leadership, health promotion, and human factors. There will also be workshops with co-researchers in the SAFE-LEAD Primary Care partner consortium ensuring sound user involvement with perspectives from patient representatives, next-of-kin representatives, a patient and user ombudsman, and perspectives from future users of the guide (managers in primary care). To ensure that the guide fits the primary care context, we will conduct 3-4 focus group interviews to collect input from managers in nursing homes and home care services who will have read the guide beforehand. Finally, the guide will be tested for fit and validity in one nursing home and one home care service with senior healthcare managers and their teams as part of the pilot test of the intervention (described in phase 2).

To facilitate implementation and use of the guide, we will also offer a web-based version. The web version will have the same content as the paper version and will be published and available for all Norwegian primary care institutions on a SAFE-LEAD Primary Care website after completion of the project in 2021.

1  
2  
3 To assess the influence of contextual factors, we will develop a mapping tool for use in the  
4 implementation and evaluation phase of the project. This will be inspired by 1) Damschroder et al.'s  
5  
6 <sup>25</sup> Consolidated Framework for Implementation Research (CFIR) and McDonald's<sup>29</sup> framework for  
7  
8 considering context in quality and safety improvement interventions, 2) additional literature  
9  
10 searches, and 3) a qualitative study with 10-12 nursing home and home care managers in a variety of  
11  
12 Norwegian municipalities (large, small, rural, urban). In the interviews, we will map the contextual  
13  
14 factors of relevance for managers' work on quality and safety in primary care. The interview guide  
15  
16 includes open questions regarding which factors managers perceive as important for their work with  
17  
18 quality and safety, and topics such as external factors, economy, and structure. The tool will consider  
19  
20 factors such as type of healthcare service (nursing home or homecare), funding, geographical  
21  
22 location, organization size, workload, and any ongoing national/regional/organizational change  
23  
24 processes.  
25  
26

## 27 28 Phase 2: Intervention design, pilot testing, and recruitment (WP2) 29

30  
31 The Medical Research Council's guidance on developing, testing and evaluating complex  
32  
33 interventions to improve healthcare<sup>37 38</sup> will be used to design the intervention. This framework  
34  
35 views healthcare interventions as flexible, non-linear processes, giving equal attention to all process  
36  
37 phases (development, testing, evaluation, wider application). Furthermore, it stresses the  
38  
39 importance of context in implementation and allows an intervention to be adapted to its setting, to  
40  
41 better ensure its success in practice<sup>37 38</sup>. The application of an organizational perspective has been  
42  
43 suggested as an aid to understanding the contextual factors and processes that may enable or  
44  
45 impede knowledge implementation interventions in healthcare settings<sup>29 39</sup>. As the SAFE-LEAD  
46  
47 Primary Care study is concerned with implementation in practice, the Organizing for Quality (OQ)  
48  
49 framework<sup>11 40</sup> will be used as a theoretical foundation in the intervention design, alongside the  
50  
51 Consolidated Framework for Implementation Research (CFIR)<sup>25</sup>. Both frameworks advocate a multi-  
52  
53 level contextual perspective on the implementation and evaluation of interventions.  
54  
55  
56  
57  
58  
59  
60

### *The SAFE-LEAD Primary Care intervention*

The SAFE-LEAD Primary Care intervention will be conducted in two stages over a period of one year<sup>37</sup>.

Stage 1 is a training component involving action learning workshops in which primary care managers and their teams will be able to apply the guide and conduct a self-diagnosis of their current quality and safety work. A team of experienced researchers will facilitate reflexive group discussions among the teams, which will take place in four group sessions (2-3 hours each) in all participating institutions over a six-month period. It is proposed that each group will consist of an extended management team (director of health and care services in municipality, nursing home director/director of homecare services, department managers, head nurses, nursing home physicians, and patient or next-of-kin representatives). These sessions will:

1. Introduce the guide to the participating institutions. This includes rationale, concepts, web-tool, and procedure for an internal management process for use of the guide within the organization.
2. Provide guidance for integrating patient and next of kin experiences in quality and safety improvement work.
3. Establish strategies to address the diagnosed quality and safety challenges.

In Stage 2 of the intervention, a sample of two nursing homes and two home care services (from the total sample of eight institutions) will receive a more comprehensive intervention component consisting of a close collaboration with the researchers. In addition to the training component described in Stage 1, the institutions in stage 2 will receive three site visits by researchers (1-3 days) per institution over a period of 12 months (Stage 1 + Stage 2=12 months). Activities during site visits will include:

1. A workshop to support existing and new learning arenas in quality and safety improvement work (1 day).
2. Observation of and feedback on quality and safety leadership strategy and practices (3 days).

- 1  
2  
3 3. A workshop to support the integration of patient and next-of-kin experiences in  
4  
5 improvement work (1 day).  
6

7  
8 A pilot test of the Stage 1 intervention will be conducted in one nursing home and one home care  
9  
10 services setting over a three-month period to test the chosen intervention contents, pedagogical  
11  
12 approaches, and the functionality of the guide developed in Phase 1. We will evaluate the pilot  
13  
14 intervention components by means of a qualitative process evaluation<sup>37 38 41</sup> involving observation in  
15  
16 the workshops and semi-structured interviews with pilot intervention participants (15-20). The pilot  
17  
18 will not test the outcome measures. The intervention will be tailored based on the pilot results.  
19

20  
21 Phase 3: Testing and evaluating the SAFE-LEAD Primary Care intervention (WP 3)  
22

23  
24 In Phase 3, we will implement the intervention Stage 1 and 2. Before and during the implementation  
25  
26 process, we will map contextual factors in all participating institutions by using the context mapping  
27  
28 tool developed in Phase 1.  
29

30  
31 The SAFE-LEAD Primary Care intervention is centred on the testing in practice of a research-based  
32  
33 quality and safety improvement guide for managers. The Knowledge to Action framework<sup>22</sup> will be  
34  
35 used to guide this part of the intervention. This approach proposes that the translation into practice  
36  
37 of a research-based guide requires an organisation to identify the problems it needs to solve; adapt  
38  
39 the guide to its own settings and contexts; assess and address barriers to its use; implement the  
40  
41 intervention; monitor the implementation and evaluate the outcomes<sup>42</sup>. The contents and  
42  
43 procedures involved in this phase of the SAFE-LEAD Primary Care intervention will be designed and  
44  
45 developed in close collaboration with the participating primary care representatives in the research  
46  
47 team, based on a reflexive, dialogue-based group technique.  
48

49  
50 The evaluation of the study entails both an in-depth qualitative work to understand the process of  
51  
52 implementing the quality and safety improvement guide in practice; how the participating primary  
53  
54 care institutions use the guide; and a quantitative measurement of the impact of the guide on quality  
55  
56 and safety improvement knowledge and practices in these institutions.  
57

1  
2  
3 Although the SAFE LEAD Primary Care intervention is a leadership intervention designed to address  
4 leadership issues, knowledge must be disseminated and applied at the clinical level (e.g., nurses and  
5 doctors) for the implementation to be effective. In the evaluation of Stage 1, we will assess the  
6 relationship between using the guide and changes in staffs' and managers' quality and safety  
7 knowledge, attitudes and practices in all eight participating institutions. We will measure this  
8 relationship by using a knowledge, attitude and practice (KAP) survey. We will conduct a literature  
9 review to identify and select measurement scales for the survey questionnaire. Managers and staff  
10 in all participating institutions will be invited to respond to the baseline survey questionnaire before  
11 the intervention starts. A second survey questionnaire will be administered to the study participants  
12 after the Stage 1 intervention (after six months). The rationale is to measure changes in quality and  
13 safety knowledge, attitudes and practices following the intervention program Stage 1.  
14  
15

16  
17 The purpose of intervention Stage 2 is to establish learning arenas, structures and processes to  
18 support leaders' self-diagnosis of their quality and safety work, and strengthen their capacity to  
19 conduct future improvement without researcher involvement. To evaluate the intervention Stage 2,  
20 we will conduct a process evaluation<sup>38 41</sup>. The process evaluation will require active researcher  
21 involvement in the intervention workshops. Data collection to evaluate the intervention processes in  
22 each of the four institutions (Stage 2) will comprise semi-structured interviews before and after the  
23 intervention period (over 12 months) with managers (approximately 5-10 x 2 depending on  
24 institution size) and staff (approximately 8-10 x 2 depending on institution size), observation of the  
25 intervention workshops and daily practice situations in the selected institutions (40-50 hours), as well  
26 as document analysis of strategies, plans, and regulatory inspection reports. During the intervention  
27 period, we will also conduct short follow-up conversations with managers participating in the  
28 intervention to collect information for use in the observation and feedback sessions. This implies a  
29 total of approximately 160 semi-structured interviews and 150-200 hours of observation. Interview  
30 guides and observation guides have been developed for managers and healthcare professionals.  
31 These guides are based on Bate et al.<sup>11</sup> and cover quality and safety challenges in terms of culture,  
32  
33  
34  
35  
36  
37  
38  
39  
40  
41  
42  
43  
44  
45  
46  
47  
48  
49  
50  
51  
52  
53  
54  
55  
56  
57  
58  
59  
60

1  
2  
3 structure, enthusiasm, education, politics, external demands, physical and technical aspects, use of  
4  
5 diverse tools in improvement work, and changes to these factors over time at the managerial and  
6  
7 healthcare professional level. The study will apply NVivo to structure, categorize and analyse the  
8  
9 qualitative data according to categories relevant for quality and safety improvement challenges<sup>11</sup>.

10  
11 Data will be analysed within cases before conducting the cross-case comparison<sup>43</sup>.

12  
13  
14 Across phase 1-3: tracer project on quality improvement in home care (WP4)

15  
16 To arrive at an in-depth understanding of the role of context and leadership in daily quality  
17  
18 improvement work, we will include a tracer quality improvement project as part of the data  
19  
20 collection<sup>33</sup>. The tracer project will be studied longitudinally over the entire project period with a  
21  
22 combination of qualitative interviews, document analysis, observation, and shadowing of staff. In the  
23  
24 tracer project, we will evaluate an improvement project titled “ABCDE – systematic observation and  
25  
26 communication in community health care”. The improvement project aims at 1) developing a  
27  
28 tailored educational program designed to improve healthcare professionals’ competencies and skills  
29  
30 in recognizing and responding to deteriorating frail patients, and 2) implementing new work routines  
31  
32 in the home care organizations to strengthen healthcare professionals’ understanding and clinical  
33  
34 judgment of deteriorating patients. The tracer project is identified with the project partners and is  
35  
36 initiated by one of the partner municipalities. The SAFE-LEAD Primary Care study will examine  
37  
38 improvement processes in real time as exemplars of how quality improvement is implemented. The  
39  
40 tracer project will enable lessons learnt, and contribute to understanding how managers are  
41  
42 improving the professional observational skills of their staff in the home care context.  
43  
44  
45

46  
47 Phase 4: Mixed-methods synthesis, cross-country comparison, theory development (WP5)

48  
49 The SAFE-LEAD Primary Care study is an opportunity to understand the meaning and impact of  
50  
51 contextual factors by analysing the influence of the quality and safety improvement guide  
52  
53 implementation via three data sets: 1) a quantitative survey of outcome measures (knowledge,  
54  
55 attitudes, practice) across a sample of eight institutions, 2) a context mapping of all participating  
56  
57  
58  
59  
60



1  
2  
3 institutions, and 3) a qualitative multiple case study with a smaller sample of four institutions  
4 providing rich information on leadership processes and practices, a small-scale implementation case  
5 study in the Netherlands, and a tracer quality improvement project. In this sense, the study pays  
6 closer and more explicit attention to multiple contextual factors<sup>44 45</sup>, and the way in which they affect  
7 the success and sustainability of implementing quality and safety improvement tools.  
8  
9

10  
11  
12  
13  
14 The different data sets will be collected in parallel and analysed separately<sup>35</sup>. In Phase 4 of the study  
15 we will synthesise the results from the qualitative, quantitative, and context data sets by using a  
16 procedure called "joint display of data"<sup>35</sup>. The researchers will jointly display all forms of data (e.g., in  
17 tables or in NVivo) responding to similar concepts and research questions. The analysis of the total  
18 amount of data in the Norwegian part of the study will compare the results from the concepts  
19 measured in the KAP survey, and what is mapped by qualitative process evaluation methods, and the  
20 findings from the tracer project. The outcomes of the analyses will be used to develop theoretical  
21 frameworks and conceptual models of the influence of context and leadership on quality and safety  
22 improvement work in primary care settings.  
23  
24  
25  
26  
27  
28  
29  
30  
31

32  
33 The Norwegian results will then be compared with Dutch results from a similar small-scale research  
34 project. The Dutch cases are used to contrast the nursing homes and home care in Norway, as the  
35 Dutch healthcare system frequently uses a greater range of improvement tools as part of managing  
36 quality and safety than the Norwegian. The cross-country analysis will compare and contrast  
37 managers' practice and competence, and whether staff members make changes in their work  
38 practice to improve quality and safety of service provision. The comparison will build on a contrasting  
39 case approach<sup>43</sup> based on the differences between the organisation of quality and safety work in  
40 healthcare systems in the two countries. Building on the approach taken in the QUASER study<sup>33</sup>, a  
41 multilevel perspective will be used, considering important macro-level contextual factors (national  
42 healthcare system), in addition to the factors identified at the meso and micro levels in the case  
43 studies. We will look at effects of different contextual factors such as funding frameworks,  
44  
45  
46  
47  
48  
49  
50  
51  
52  
53  
54  
55  
56  
57  
58  
59  
60

1  
2  
3 regulation, prioritisation, organisation, and competence level. National differences will be analysed  
4  
5 to better understand the effect of macro-level healthcare system factors on the success of quality  
6  
7 improvement implementation processes.  
8

## 9 10 **ETHICS AND DISSEMINATION**

### 11 12 **Ethical reflections**

13  
14  
15 The SAFE-LEAD Primary Care leadership-focused intervention targets a potential knowledge gap  
16  
17 among managers and supports their work on quality and safety improvement. The risk of negative  
18  
19 effects on patient outcomes is thus minimal. The potential of not having a positive effect of the  
20  
21 intervention on managers' leadership competence is present, but the risk of negative patient  
22  
23 outcome due to this is limited. The patient and next-of-kin perspectives are key throughout the SAFE-  
24  
25 LEAD Primary Care study. Patients and next-of-kin representatives participated in the project  
26  
27 development and will collaborated with the project team as co-researchers throughout the project  
28  
29 period. Different measures are involved in the quality and safety improvement guide itself  
30  
31 (strategies, measures) and in the intervention components (workshops on use of patient  
32  
33 experiences) to improve managers' abilities to involve patient and next of kin in improvement work.  
34  
35

36  
37 The SAFE-LEAD Primary Care study is approved by the Norwegian Centre for Research Data  
38  
39 (2017/52324 and 54855), and exempted from ethical approval from Regional Ethical Committee  
40  
41 because no health information will be collected. The Norwegian approval also includes approval for  
42  
43 data collection in the Netherlands. The Dutch ethical approval system does not require ethical  
44  
45 approval for research projects not involving patient data, as in the SAFE-LEAD Primary Care. All  
46  
47 participants will sign informed consent and will be recruited on a voluntary basis. No patient records  
48  
49 or other patient data will be collected.  
50

### 51 52 **Dissemination**

53  
54  
55  
56  
57  
58  
59  
60

The SAFE-LEAD Primary Care partners have agreed upon publication guidelines, a publication strategy, and a publication plan. The publication strategy consists of dissemination in scientific peer-reviewed journals, books and presentations at academic conferences. Moreover, there is a strategy to ensure dissemination in popular science forums and in social media. The project has established a SAFE-LEAD web page, a SAFE-LEAD Facebook account, newsletters, and posters. The project has an international expert advisory board that will be invited annually to give input to the study and contribute to the sharing of results.

The publication plan will evolve over time but includes the following planned scientific dissemination activities:

- Two PhD theses (authors Terese Johannessen and Torunn Strømme).
- 18-20 scientific articles in a peer-reviewed special issue and in different peer-reviewed journals.
- A book on Quality and Safety in Primary Care involving international contributions.
- Local seminars at the study sites (including user groups).
- Norway-Netherland seminar in 2020 to present final project results. Open seminar with target group healthcare managers, inspection authority, researchers, user groups, professional associations, governmental bodies, etc.
- Special sessions at the 5th and 6th Nordic Conference on Research in Patient Safety and Quality in Healthcare.
- Presentations at regional, national and international conferences.
- Popular science presentations in national media and healthcare magazines.

Ten primary publications are planned (see Table 1):

Table 1. Planned primary publications from the SAFE-LEAD Primary Care study

| Articles  | Planned Scientific Article                    | Main data source |
|-----------|-----------------------------------------------|------------------|
| Article 1 | Improving Quality and Safety in Nursing Homes | Literature       |

|           |                                                                                                                                         |                                                                                              |
|-----------|-----------------------------------------------------------------------------------------------------------------------------------------|----------------------------------------------------------------------------------------------|
|           | and Home Care: The study protocol of a mixed methods research design to implement a leadership intervention                             | Policy documents<br>Scientific methods                                                       |
| Article 2 | Mapping of contextual factors in primary care - a mixed methods design                                                                  | Literature review<br>Context mapping<br>Semi-structured interviews                           |
| Article 3 | Designing an intervention for improving leadership of quality and safety in nursing homes and home care.                                | Semi-structured interviews<br>Partner workshops                                              |
| Article 4 | Literature review of measurement scales of relevance for mapping quality and safety knowledge, attitudes, and practice in primary care. | Literature review                                                                            |
| Article 5 | Understanding the role of a leadership intervention on quality and safety leadership processes                                          | Process evaluation including semi-structured interviews, focus group interviews, observation |
| Article 6 | The impact of a leadership intervention on quality and safety knowledge, attitudes and practice in primary care.                        | Quantitative data from KAP survey                                                            |
| Article 7 | Implementation of a quality and safety improvement guide and effects on quality and safety work in a nursing home context.              | Mix:<br>KAP survey<br>Process evaluation<br>Context mapping                                  |
| Article 8 | Implementation of a quality and safety                                                                                                  | Mix:                                                                                         |

|            |                                                                                                                                          |                                                             |
|------------|------------------------------------------------------------------------------------------------------------------------------------------|-------------------------------------------------------------|
|            | improvement guide and effects on quality and safety work in a home care context.                                                         | KAP survey<br>Process evaluation<br>Context mapping         |
| Article 9  | The meaning of context: Comparing the implementation of a quality and safety improvement guide in the nursing home and home care context | Mix:<br>KAP survey<br>Process evaluation<br>Context mapping |
| Article 10 | Cross country comparison of working on quality and safety in Norwegian and Dutch primary care services.                                  | Mix:<br>KAP survey<br>Process evaluation<br>Context mapping |

### AUTHORS' CONTRIBUTIONS

SW and KAa applied for funding of the SAFE-LEAD Primary Care study to the RCN, planned the study design and study protocol, and contributed to the development of the data collection tools. SW and ER drafted the manuscript, with substantial input from KAa, and revised it based on comments from all co-authors. ER contributed to the study design, development of data collection tools, and was responsible for the application for approval of the study to the Norwegian Centre for Research Data. Authors TS, TJ and MS contributed to the study design and development of data collection tools, and commented on the draft. Authors HvB and RB contributed to the study design and development of the data collection tools, commented on the draft, and are responsible for the Dutch part of the study. Authors IAa, BU, EHR, LHT, and ATSP contributed to the study design and have commented on the draft. All authors have approved the final version of the manuscript.

### FUNDING STATEMENT

1  
2  
3 This work was supported by The Research Council of Norway (RCN) grant number 256681/H10 and  
4  
5 the University of Stavanger, Norway.  
6

#### 7 **COMPETING INTEREST**

8  
9  
10 The authors declare there are no conflict of interest.  
11

#### 12 **ACKNOWLEDGEMENT**

13  
14  
15 Siri Wiig, Karina Aase, and Veslemøy Guise were responsible for the application for funding to the  
16  
17 Research Council of Norway (RCN). We wish to acknowledge the contribution from Veslemøy Guise  
18  
19 who played a key role in developing the grant application to the RCN, and to the Patient Ombudsman  
20  
21 Vestfold Torunn Grinvoll, senior representative Elsa Kristiansen, and Lene Schibevaag in the SAFE-  
22  
23 LEAD project who have provided input to the study design and development.  
24

25  
26  
27 The leadership guide applied in the SAFE-LEAD study is based on the results from the study *Quality*  
28  
29 *and Safety in European Union Hospitals: A Research-based Guide for Implementing Best Practice and*  
30  
31 *a Framework for Assessing Performance (QUASER)*. The QUASER project received funding from the  
32  
33 European Community's Seventh Framework Programme (FP7/2007-2013) under grant agreement  
34  
35 no. 241724. Authors Roland Bal, Hester van de Bovenkamp, Karina Aase, and Siri Wiig were all part of  
36  
37 the QUASER project from Norway and the Netherlands and contributed to writing the original guide.  
38  
39 We wish to acknowledge the other members of the QUASER team: Naomi Fulop (project manager),  
40  
41 Susan Burnett, Glenn Robert, Janet Anderson, Charles Vincent, Kathryn Charles, Susie Edwards,  
42  
43 Lisbeth Hoeg-Jensen, Heidi Poestges, and Anna Renz (England); Julia Quartz, and Anne Marie  
44  
45 Weggelaar (the Netherlands); Boel Anderson-Gäre, Pär Höglund, Tony Andersson, Anette Karlton,  
46  
47 Johan Calltorp, and Johan Sanne (Sweden); Francisco Nunes, Sara Gomes, and Alexandra Fernandes  
48  
49 (Portugal); Christian von Plessen (Norway).  
50  
51

#### 52 **REFERENCES**

53  
54  
55  
56 1. Vincent C, Amalberti R. Safer healthcare. London: Springer Open, 2016.  
57

- 1
  - 2
  - 3
  - 4
  - 5
  - 6
  - 7
  - 8
  - 9
  - 10
  - 11
  - 12
  - 13
  - 14
  - 15
  - 16
  - 17
  - 18
  - 19
  - 20
  - 21
  - 22
  - 23
  - 24
  - 25
  - 26
  - 27
  - 28
  - 29
  - 30
  - 31
  - 32
  - 33
  - 34
  - 35
  - 36
  - 37
  - 38
  - 39
  - 40
  - 41
  - 42
  - 43
  - 44
  - 45
  - 46
  - 47
  - 48
  - 49
  - 50
  - 51
  - 52
  - 53
  - 54
  - 55
  - 56
  - 57
  - 58
  - 59
  - 60
2. Jha A, Prasopa-Plaizier N, Larizgoitia I, et al. Patient safety research: an overview of the global evidence. *Quality and Safety in Health Care* 2010;19(1):42-47.
  3. Henriksen K, Joseph A, Zayas-Cabán T. The human factors of home health care: a conceptual model for examining safety and quality concerns. *Journal of Patient Safety* 2009;5(4):229-36.
  4. Macdonald MT, Lang A, Storch J, et al. Examining markers of safety in homecare using the international classification for patient safety. *BMC health services research* 2013;13(1):191.
  5. Lang A, Edwards N, Fleischer A. Safety in home care: a broadened perspective of patient safety. *International Journal for Quality in Health Care* 2008;20(2):130-35.
  6. Guise V, Anderson J, Wiig S. Patient safety risks associated with telecare: a systematic review and narrative synthesis of the literature. *BMC health services research* 2014;14(1):588.
  7. Wooldridge AR, Carayon P, Hundt AS, et al. SEIPS-based process modeling in primary care. *Applied Ergonomics* 2017;60:240-54.
  8. Mintzberg H. *Managing the Myths of Health Care: Bridging the Separations Between Care, Cure, Control, and Community*: Berrett-Koehler Publishers 2017.
  9. Oldenhof L, Oldenhof L, Stoopendaal A, et al. From boundaries to boundary work: middle managers creating inter-organizational change. *Journal of health organization and management* 2016;30(8):1204-20.
  10. Parand A, Dopson S, Renz A, et al. The role of hospital managers in quality and patient safety: a systematic review. *BMJ open* 2014;4(9):e005055.
  11. Bate P, Mendel P, Robert G. *Organizing for quality: the improvement journeys of leading hospitals in Europe and the United States*: Radcliffe Publishing 2008.
  12. Leape L, Berwick D, Clancy C, et al. Transforming healthcare: a safety imperative. *Quality and Safety in Health Care* 2009;18(6):424-28.
  13. Künzle B, Kolbe M, Grote G. Ensuring patient safety through effective leadership behaviour: A literature review. *Safety Science* 2010;48(1):1-17. doi: <http://dx.doi.org/10.1016/j.ssci.2009.06.004>
  14. Glickman SW, Baggett KA, Krubert CG, et al. Promoting quality: the health-care organization from a management perspective. *International Journal for Quality in Health Care* 2007;19(6):341-48.
  15. Wiig S, Storm M, Aase K, et al. Investigating the use of patient involvement and patient experience in quality improvement in Norway: rhetoric or reality? *BMC health services research* 2013;13(1):206.
  16. Ministry of Health and Care Services. Meld.St. 10 (2012-2013). Kvalitet og pasientsikkerhet. . In: Services MoHaC, ed. Oslo, 2012.
  17. Ministry of Health and Care Services. Meld. St. 11 (2014–2015). Kvalitet og pasientsikkerhet 2013. In: Services MoHaC, ed., 2014.
  18. Wiig S, Robert G, Anderson JE, et al. Applying different quality and safety models in healthcare improvement work: Boundary objects and system thinking. *Reliability Engineering & System Safety* 2014;125:134-44.
  19. Collins DB, Holton EF. The effectiveness of managerial leadership development programs: A meta-analysis of studies from 1982 to 2001. *Human resource development quarterly* 2004;15(2):217-48.
  20. Amagoh F. Leadership development and leadership effectiveness. *Management Decision* 2009;47(6):989-99.
  21. Tsoukas H. The firm as a distributed knowledge system: a constructionist approach. *Strategic management journal* 1996;17(S2):11-25.
  22. Straus S, Tetroe J, Graham ID. *Knowledge translation in health care: moving from evidence to practice*. 2 ed. Oxford: Wiley Blackwell 2013.
  23. Øvretveit J. Understanding the conditions for improvement: research to discover which context influences affect improvement success. *BMJ Qual Saf* 2011;20

- 1
  - 2
  - 3
  - 4
  - 5
  - 6
  - 7
  - 8
  - 9
  - 10
  - 11
  - 12
  - 13
  - 14
  - 15
  - 16
  - 17
  - 18
  - 19
  - 20
  - 21
  - 22
  - 23
  - 24
  - 25
  - 26
  - 27
  - 28
  - 29
  - 30
  - 31
  - 32
  - 33
  - 34
  - 35
  - 36
  - 37
  - 38
  - 39
  - 40
  - 41
  - 42
  - 43
  - 44
  - 45
  - 46
  - 47
  - 48
  - 49
  - 50
  - 51
  - 52
  - 53
  - 54
  - 55
  - 56
  - 57
  - 58
  - 59
  - 60
24. Stetler CB, Ritchie JA, Rycroft-Malone J, et al. Institutionalizing evidence-based practice: an organizational case study using a model of strategic change. *Implementation Science* 2009;4(1):78.
25. Damschroder LJ, Aron DC, Keith RE, et al. Fostering implementation of health services research findings into practice: a consolidated framework for advancing implementation science. *Implementation science* 2009;4(1):1.
26. Rycroft-Malone J, Bucknall T. Models and frameworks for implementing evidence-based practice: linking evidence to action. Oxford: Wiley Blackwell 2010.
27. Shekelle PG, Pronovost PJ, Wachter RM, et al. Advancing the science of patient safety. *Annals of internal medicine* 2011;154(10):693-96.
28. Kaplan HC, Brady PW, Dritz MC, et al. The influence of context on quality improvement success in health care: a systematic review of the literature. *Milbank Q* 2010;88(4):500-59.
29. McDonald KM. Considering context in quality improvement interventions and implementation: concepts, frameworks, and application. *Academic pediatrics* 2013;13(6):S45-S53.
30. Coles E, Wells M, Maxwell M, et al. The influence of contextual factors on healthcare quality improvement initiatives: what works, for whom and in what setting? Protocol for a realist review. *Systematic Reviews* 2017;6(1):168.
31. Ministry of Health and Care Services. Meld. St. 26 (2014-2015) Fremtidens primærhelsetjeneste – nærhet og helhet. In: Services MoHaC, ed. Oslo, 2014.
32. Norwegian Board of Health Supervision. Tilsynsmelding 2013. In: helsetilsyn S, ed. Oslo, 2014.
33. Robert GB, Anderson JE, Burnett SJ, et al. A longitudinal, multi-level comparative study of quality and safety in European hospitals: the QUASER study protocol. *BMC health services research* 2011;11(1):285.
34. Fulop N. Quaser. The Hospitalkl Guide. A research-based tool to reflect on and develop your quality improvement strategies: University College London; 2014 [cited 2017 13.11]. Available from: [https://www.ucl.ac.uk/dahr/pdf/study\\_documents/iQUASER Hospital Guide 291014\\_press-ready\\_cs4.pdf](https://www.ucl.ac.uk/dahr/pdf/study_documents/iQUASER_Hospital_Guide_291014_press-ready_cs4.pdf).
35. Creswell JW. Research design: Qualitative, quantitative, and mixed methods approaches: Sage publications 2013.
36. Yin R. Case study research: Design and methods 5ed. Thousand Oaks Sage 2014.
37. Craig P, Dieppe P, Macintyre S, et al. Developing and evaluating complex interventions: the new Medical Research Council guidance. *Bmj* 2008;337:a1655.
38. Moore GF, Audrey S, Barker M, et al. Process evaluation of complex interventions: Medical Research Council guidance. *bmj* 2015;350:h1258.
39. Denis J-L, Lehoux P. Organizational theory. In: Straus S, Tetroe J, Graham I, eds. Knowledge translation in health care: moving from evidence to practice. Oxford: Wiley Blackwell 2009.
40. Bergeroed I, Wiig S. Ledelse og pasientsikkerhet. (Leadership and patient safety). . In: Aase K, ed. Pasientsikkerhet-teori og praksis. 2 ed. Oslo: Universitetsforlaget 2015.
41. Patton M. Qualitative research and Evaluation Methods. 3 ed. Thousand Oaks: Sage 2002.
42. Harrison MB, Graham ID, Fervers B, et al. Adapting knowledge to a local context. In: Tetroe J, Graham I, eds. Knowledge translation in health care: Moving from evidence to practice. Oxford: Wiley Blackwell 2009:73-82.
43. Yin R. Case study research: design and methods 3ed. Thousand Oaks Sage 2003.
44. House R, Rousseau DM, Thomas-Hunt M. The Meso paradigm: A framework for the integration of micro and macro organizational behavior. *Review of Organization Behavior* 1995;17:71-114.
45. Wiig S. Contributions to risk management in the public sector. PhD Thesis UiS no 48 February 2008



# BMJ Open

## Improving Quality and Safety in Nursing Homes and Home Care: The study protocol of a mixed methods research design to implement a leadership intervention

|                                 |                                                                                                                                                                                                                                                                                                                                                                                                                                                                                                                                                                                                                                                                                                                                                                                                                                                                                                                                                                                                                                                                                                                                                                                                                                                                                                                                                                                                                                                                                                                    |
|---------------------------------|--------------------------------------------------------------------------------------------------------------------------------------------------------------------------------------------------------------------------------------------------------------------------------------------------------------------------------------------------------------------------------------------------------------------------------------------------------------------------------------------------------------------------------------------------------------------------------------------------------------------------------------------------------------------------------------------------------------------------------------------------------------------------------------------------------------------------------------------------------------------------------------------------------------------------------------------------------------------------------------------------------------------------------------------------------------------------------------------------------------------------------------------------------------------------------------------------------------------------------------------------------------------------------------------------------------------------------------------------------------------------------------------------------------------------------------------------------------------------------------------------------------------|
| Journal:                        | <i>BMJ Open</i>                                                                                                                                                                                                                                                                                                                                                                                                                                                                                                                                                                                                                                                                                                                                                                                                                                                                                                                                                                                                                                                                                                                                                                                                                                                                                                                                                                                                                                                                                                    |
| Manuscript ID                   | bmjopen-2017-020933.R1                                                                                                                                                                                                                                                                                                                                                                                                                                                                                                                                                                                                                                                                                                                                                                                                                                                                                                                                                                                                                                                                                                                                                                                                                                                                                                                                                                                                                                                                                             |
| Article Type:                   | Protocol                                                                                                                                                                                                                                                                                                                                                                                                                                                                                                                                                                                                                                                                                                                                                                                                                                                                                                                                                                                                                                                                                                                                                                                                                                                                                                                                                                                                                                                                                                           |
| Date Submitted by the Author:   | 07-Feb-2018                                                                                                                                                                                                                                                                                                                                                                                                                                                                                                                                                                                                                                                                                                                                                                                                                                                                                                                                                                                                                                                                                                                                                                                                                                                                                                                                                                                                                                                                                                        |
| Complete List of Authors:       | <p>Wiig, Siri; University of Stavanger, SHARE- Centre for Resilience in Healthcare, Faculty of Health Sciences</p> <p>Ree, Eline ; University of Stavanger, SHARE-Centre for Resilience in Healthcare, Faculty of Health Sciences</p> <p>Johannessen, Terese ; Univerity of Stavanger , SHARE- Centre for Resilience in Healthcare, Faculty of Health Sciences</p> <p>Strømme, Torunn; University of Stavanger, SHARE- Centre for Resilience in Healthcare, Faculty of Health Sciences</p> <p>Storm, Marianne; University of Stavanger, SHARE-Centre for Resilience in Healthcare, Faculty of Health Sciences</p> <p>Aase, Ingunn; University of Stavanger, SHARE-Centre for Resilience in Healthcare, Faculty of Health Sciences</p> <p>Ullebust, Berit; Førde municipality, Centre for Developing Institutional and Home Care Services, Sogn &amp; Fjordane</p> <p>Holen-Rabbersvik, Elisabeth; University of Agder , Department of Health and Nursing Sciences; University of Stavanger, SHARE-Centre for Resilience in Healthcare, Faculty of Health Sciences</p> <p>Hurup Thomsen, Line; Stavanger Kommune, Centre for Developing Institutional and Home Care Services Rogaland</p> <p>Sandvik Pedersen, Anne</p> <p>van de Bovenkamp, Hester; Erasmus University , School of Health Policy &amp; Management</p> <p>Bal, Roland; Erasmus University, School of Health Policy and Management</p> <p>Aase, Karina; University of Stavanger, Centre for Resilience in Healthcare, Faculty of Health Sciences</p> |
| <b>Primary Subject Heading</b>: | Health services research                                                                                                                                                                                                                                                                                                                                                                                                                                                                                                                                                                                                                                                                                                                                                                                                                                                                                                                                                                                                                                                                                                                                                                                                                                                                                                                                                                                                                                                                                           |
| Secondary Subject Heading:      | Health services research                                                                                                                                                                                                                                                                                                                                                                                                                                                                                                                                                                                                                                                                                                                                                                                                                                                                                                                                                                                                                                                                                                                                                                                                                                                                                                                                                                                                                                                                                           |
| Keywords:                       | quality, patient safety, PRIMARY CARE, leadership, intervention, context                                                                                                                                                                                                                                                                                                                                                                                                                                                                                                                                                                                                                                                                                                                                                                                                                                                                                                                                                                                                                                                                                                                                                                                                                                                                                                                                                                                                                                           |
|                                 |                                                                                                                                                                                                                                                                                                                                                                                                                                                                                                                                                                                                                                                                                                                                                                                                                                                                                                                                                                                                                                                                                                                                                                                                                                                                                                                                                                                                                                                                                                                    |

SCHOLARONE™  
Manuscripts

1  
2  
3 **Improving Quality and Safety in Nursing Homes and Home Care: The study**  
4  
5 **protocol of a mixed methods research design to implement a leadership**  
6  
7 **intervention**  
8  
9

10  
11  
12  
13  
14 Siri Wiig\* (SW), SHARE - Centre for Resilience in Healthcare, Faculty of Health Sciences, University of  
15  
16 Stavanger, Stavanger, Norway

17  
18  
19 Eline Ree (ER), SHARE - Centre for Resilience in Healthcare, Faculty of Health Sciences, University of  
20  
21 Stavanger, Stavanger, Norway

22  
23  
24 Terese Johannessen (TJ), SHARE - Centre for Resilience in Healthcare, Faculty of Health Sciences,  
25  
26 University of Stavanger, Stavanger, Norway

27  
28  
29 Torunn Strømme (TS), SHARE - Centre for Resilience in Healthcare, Faculty of Health Sciences,  
30  
31 University of Stavanger, Stavanger, Norway

32  
33  
34 Marianne Storm (MS), SHARE - Centre for Resilience in Healthcare, Faculty of Health Sciences,  
35  
36 University of Stavanger, Stavanger, Norway

37  
38  
39 Ingunn Aase (IAa), SHARE - Centre for Resilience in Healthcare, Faculty of Health Sciences, University  
40  
41 of Stavanger, Stavanger, Norway

42  
43  
44 Berit Ullebust (BU), Center for Developing Institutional and Home Care Services Sogn and Fjordane,  
45  
46 Førde municipality, Førde, Norway

47  
48  
49 Elisabeth Holen-Rabbersvik (EHR), SHARE - Centre for Resilience in Healthcare, Faculty of Health  
50  
51 Sciences, University of Stavanger, Stavanger, Norway; Department of Health and Nursing Sciences,  
52  
53 University of Agder, Kristiansand, Norway.

1  
2  
3 Line Hurup Thomsen (LHT), Center for Developing Institutional and Home Care Services Rogaland,  
4 Stavanger municipality, Stavanger, Norway

5  
6  
7 Anne Torhild Sandvik Pedersen (ATSP), next-of-kin representative, Stavanger, Norway

8  
9  
10 Hester van de Bovenkamp (HvB), Erasmus University, School of Health Policy & Management,  
11 Rotterdam, the Netherlands

12  
13  
14 Roland Bal (RB), Erasmus University, School of Health Policy & Management, Rotterdam, the  
15 Netherlands

16  
17  
18 Karina Aase (KAa), SHARE - Centre for Resilience in Healthcare, Faculty of Health Sciences, University  
19 of Stavanger, Stavanger, Norway

20  
21  
22 \*Siri Wiig, N-4036 Stavanger, Norway, email: [siri.wiig@uis.no](mailto:siri.wiig@uis.no), telephone: 0047-51834288

23  
24  
25 Word count, excluding references: 4431

## 26 27 28 29 30 31 32 33 34 35 **ABSTRACT**

### 36 37 38 **Introduction**

39  
40  
41 Nursing homes and home care face challenges across different countries as people are living longer,  
42 often with chronic conditions. There is a lack of knowledge regarding implementation and impact of  
43 quality and safety interventions as most research evidence so far is generated in hospitals.  
44  
45 Additionally, there is a lack of effective leadership tools for quality and safety improvement work in  
46  
47 this context.  
48  
49  
50

### 51 52 **Methods and analysis**

1  
2  
3 The aim of the 'Improving Quality and Safety in Primary Care – Implementing a Leadership  
4 Intervention in Nursing Homes and Homecare' (SAFE-LEAD) study is to develop and evaluate a  
5 research-based leadership guide for managers to increase quality and safety competence. The  
6 project applies a mixed-methods design and explores the implications of the leadership guide on  
7 managers' and staffs' knowledge, attitudes, and practices. Four nursing homes and four home care  
8 services from different Norwegian municipalities will participate in the intervention. Surveys, process  
9 evaluation (interviews, observations) and document analyses will be conducted to evaluate the  
10 implementation and impact of the leadership intervention. A comparative study of Norway and the  
11 Netherlands will establish knowledge of the context-dependency of the intervention.

### 22 **Ethics and dissemination**

23  
24  
25 The study is approved by the Norwegian Centre for Research Data (2017/52324 and 54855). The  
26 results will be disseminated through scientific articles, two PhD dissertations, an anthology,  
27 presentations at national and international conferences, and in social media, newsletters, and in the  
28 press. The results will generate knowledge to inform leadership practices in nursing homes and home  
29 care. Moreover, the study will build new theory on leadership interventions and the role of  
30 contextual factors in nursing homes and home care.

31  
32  
33  
34  
35  
36  
37  
38 **KEYWORDS:** quality, safety, primary care, nursing home, home care, leadership, intervention,  
39 context  
40  
41

### 43 **STRENGTHS AND LIMITATIONS OF THIS STUDY**

- 44  
45  
46 • The study translates European Union research findings into practice by implementing  
47 a leadership-focused quality and safety improvement intervention in Norwegian  
48 nursing homes (4) and home care (4).  
49  
50  
51  
52  
53  
54  
55  
56  
57  
58  
59  
60

- A key strength of the SAFE-LEAD study is user involvement in all phases, including co-researchers representing patients, next-of-kin, a patient and user ombudsman, and managers in nursing homes and home care.
- A mixed-methods design involving a contrasting case study approach enables the SAFE-LEAD study to explore the role of context when implementing a leadership intervention in nursing homes and home care services located in large, small, rural and urban municipalities.
- Process evaluation over 12 months will be limited to 4 out of 8 recruited institutions in the SAFE-LEAD intervention giving few possibilities for generalizing results.
- Despite a detailed adaptive process with an extensive level of user involvement, building on a leadership guide initially developed for the hospital context might disregard information vital for the nursing home and home care services context.

## INTRODUCTION

### Quality and safety challenges

Nursing homes and home care face challenges worldwide as people live longer, often with one or more chronic conditions that should be treated as conservatively as possible<sup>1</sup>. Most of the research on quality and safety in healthcare is conducted in hospital contexts so we know little about other healthcare settings<sup>2</sup>. Numerous quality and safety challenges exist in the nursing home and home care contexts. For example, safety in home care is inseparable from relationships and interactions between patients, informal caregivers and formal healthcare providers<sup>3-6</sup>. In addition, minor mistakes, discontinuity, and multiple care providers with little overview of patient status and development may cause cumulative negative effects over time. This cumulative effect is especially important when we consider quality and safety at home and in the community<sup>1</sup>. In this context, the role of organizational structures and processes is under-researched, and there is a need for more

1  
2  
3 knowledge on the ways in which organizational and provider factors combine to affect quality and  
4  
5 safety<sup>2,7</sup>.

### 6 7 8 **The role of management and leadership**

9  
10 In recent work, Mintzberg<sup>8</sup> focuses on the importance of leadership in healthcare management, as  
11  
12 the two have often been separated. Management involvement and a wide range of leadership roles  
13  
14 and activities are crucial in the development of structures and cultures to improve patient safety and  
15  
16 achieve sustained quality in healthcare services<sup>2,9-14</sup>. Although quality and safety improvement work  
17  
18 in healthcare is predicated on interaction and collaboration among many organizational stakeholders  
19  
20<sup>11,15</sup>, the onus is on healthcare managers to commit to improvement efforts and use research-based  
21  
22 knowledge in planning and improving quality and safety work<sup>16-18</sup>. Involving managers in properly  
23  
24 designed implementation programs has been found to have a positive impact on organizational  
25  
26 outcomes<sup>19</sup>, especially if the programs are comprehensive and systematically integrated into the  
27  
28 organizational culture<sup>20</sup>. As such, there is ongoing demand for more and better knowledge about  
29  
30 quality and safety improvement work focused on the abilities and capacities of managers<sup>13</sup>. Of  
31  
32 particular concern is strengthening leadership capacity, competence, and quality and safety in  
33  
34 nursing homes and home care services.  
35  
36  
37

### 38 39 **Understanding the role of context in knowledge translation**

40  
41 Translating research-based knowledge into practice in healthcare is challenging<sup>21,22</sup>. One of the key  
42  
43 challenges for management teams is how to implement evidence-based knowledge to facilitate  
44  
45 quality and safety improvement at the local service level<sup>15,23</sup>. Many knowledge translation  
46  
47 frameworks have been proposed that acknowledge the socially situated nature of knowledge  
48  
49 implementation practices<sup>22,24-26</sup>. Nevertheless, the literature says little about the influence of context  
50  
51 on successful quality and safety implementation interventions in healthcare<sup>23,27-30</sup>. Context can refer  
52  
53 to both the inner (internal) and outer (external) settings of an organization. Internal organizational  
54  
55 factors include structural characteristics (e.g., location and size); the local workings of teams and  
56  
57  
58  
59  
60

1  
2  
3 leadership; and the organizational culture and implementation climate. Among the external factors  
4  
5 are applicable laws, regulatory requirements, external policies and incentives, and funding  
6  
7 structures<sup>29</sup>. Differences in internal and external organizational contexts are thought to be  
8  
9 responsible for some of the variability seen in the implementation of quality and safety improvement  
10  
11 efforts in diverse local practice settings<sup>28 29</sup>. However, there are few if any studies of the role of  
12  
13 contextual factors in leadership interventions in nursing homes and home care.  
14  
15

### 16 **Organization and quality and safety status of primary care in Norway**

17  
18 Although the organization and responsibilities of healthcare systems can differ, the primary care  
19  
20 setting is an important arena for the provision of health and social care services in Norway as in many  
21  
22 other countries. In Norway, the delivery of primary care services is the responsibility of the  
23  
24 municipalities, which provide most of the country's home care and nursing home services, which is  
25  
26 within the scope of our study. The Norwegian municipalities are by law required to work to improve  
27  
28 healthcare quality and safety, and managers at all service levels are responsible for the planning,  
29  
30 implementation, evaluation and systematic improvement of service quality and safety.  
31  
32  
33

34  
35 However, as noted in a recent government white paper on Norwegian primary care services, quality  
36  
37 and safety efforts in municipal health services to date have been insufficient<sup>31</sup>. Inspections made by  
38  
39 the Norwegian Board of Health Supervision have repeatedly found inadequate quality assurance and  
40  
41 control measures across primary care organizations. While quality improvement and safety efforts  
42  
43 should be a top priority of municipal management teams, quality and safety work is often poorly  
44  
45 rooted in management, and in some places not considered a management task at all<sup>32</sup>. Where quality  
46  
47 and safety improvement work has been undertaken, there have been challenges in translating  
48  
49 knowledge into practice<sup>31</sup>. Such reports have led to the conclusion that there is a serious lack of basic  
50  
51 leadership competencies related to quality and safety improvement work in Norwegian primary care  
52  
53 services. The latter constitutes the major rationale for conducting our study.  
54  
55

### 56 **Aims and research questions**

1  
2  
3 The 'Improving Quality and Safety in Primary Care – Implementing a Leadership Intervention in  
4 Nursing Homes and Homecare' (SAFE-LEAD) study is translating research findings from the European  
5 Union 7<sup>th</sup> Framework Programme (EU FP7) funded project 'Quality and Safety in Europe by Research'  
6 (QUASER) into practice in Norway by implementing a leadership-focused quality and safety  
7 improvement intervention in the nursing homes and home care settings. The intervention is built  
8 around the implementation of a quality and safety improvement tool, which is a leadership guide for  
9 managers in nursing homes and home care. The leadership guide is based on the results from the  
10 QUASER study<sup>33</sup> where the consortium, including SAFE-LEAD partners, developed the *QUASER*  
11 *Hospital Guide - A research-based tool to reflect on and develop your quality improvement*  
12 *strategies*<sup>34</sup>. The QUASER Hospital Guide defines quality as care that is clinically effective, safe, and  
13 patient-centred. The guide is structured around eight quality challenges (structure, culture,  
14 leadership, politics, education, emotions, physical and technical issues, external demands). A short  
15 series of questions will stimulate reflection, accompanied by a decision-aid menu of potential  
16 options, with empirical examples of possible quality and safety improvement solutions across the  
17 macro, meso, and micro system levels. The guide is designed to facilitate patient safety and quality  
18 improvement in clinical practice and service delivery, by providing a systematic means for managers  
19 to pinpoint the strengths and weaknesses of their improvement strategies and reflect on what the  
20 tailored measures needed in their institution and context.

21  
22  
23  
24  
25  
26  
27  
28  
29  
30  
31  
32  
33  
34  
35  
36  
37  
38  
39  
40  
41 The SAFE-LEAD study will investigate how and to what extent different contextual factors influence  
42 the implementation process and the effectiveness of such a research-based guide in a variety of  
43 nursing homes and home care services. The aim of the study is to build leadership competence and  
44 guide managers in their efforts to advance and improve vital quality and safety strategies, attitudes  
45 and practices in their organizations. The specific objectives of the SAFE-LEAD study are to:

- 46  
47  
48  
49  
50  
51  
52 a) Investigate the influence of context on the implementation of a research-based quality and  
53 safety leadership intervention in nursing homes and home care.  
54  
55  
56  
57  
58  
59  
60



- 1  
2  
3 b) Test the effectiveness of the leadership intervention on changes in managers' and healthcare  
4 professionals' knowledge, attitudes and practices relating to quality and safety in nursing homes  
5 and home care.  
6  
7  
8  
9 c) Develop theory to guide implementation of future leadership interventions designed to improve  
10 the quality and safety in nursing homes and home care.  
11  
12  
13

14 The following research questions will guide the SAFE-LEAD study:  
15

- 16  
17 1. What are the key contextual factors that affect quality and safety improvement work in the  
18 Norwegian nursing homes and home care setting?  
19  
20 2. How can the SAFE-LEAD intervention best be designed to implement use of a leadership guide in  
21 nursing homes and home care?  
22  
23 3. Which contextual factors, including leadership practices and processes influence successful  
24 implementation and use of a leadership guide in nursing homes and home care?  
25  
26 4. How can patient and next-of-kin involvement be integrated into use of a leadership guide and  
27 the overall SAFE-LEAD intervention?  
28  
29 5. What is the impact of the SAFE-LEAD intervention on managers' and staffs' quality and safety  
30 knowledge, attitudes, and practice?  
31  
32 6. What are the implications of the SAFE-LEAD research findings on the development of theoretical  
33 frameworks for organizational context, leadership processes, and quality and safety  
34 improvement efforts in nursing homes and home care settings?  
35  
36 7. What are the similarities and differences in contextual factors determining successful  
37 implementation of research-based quality and safety improvement tools in Norway and the  
38 Netherlands?  
39  
40 8. How and to what extent do the identified key contextual factors explain implementation, uptake,  
41 and impact of the SAFE-LEAD intervention across nursing homes and home care services?  
42  
43  
44  
45  
46  
47  
48  
49  
50  
51  
52  
53  
54

## 55 **METHODOLOGY**

56  
57  
58  
59  
60

## Design

The SAFE-LEAD study (2016-2021) applies a convergent parallel mixed-methods design<sup>35</sup>. We will collect both quantitative and qualitative data in parallel, analyse them separately and compare results subsequently<sup>35</sup>.

## Setting

The main study setting is nursing homes and home care in the Norwegian primary care system. In addition, a small-scale study will take place in a nursing home and a home care institution in the Netherlands.

## Study sample and recruitment

Four nursing homes and four home care services from different Norwegian municipalities will be recruited to participate in the SAFE-LEAD intervention. To understand the role of context, the sampling strategy is based on a contrasting case approach<sup>36</sup>, with selection criteria focusing on diversity in size, geography, and variation between urban and rural services. A similar small-scale study of one nursing home and one home care service will be conducted in the Dutch healthcare setting, allowing for comparison of two countries with different national healthcare and regulatory systems. The recruitment of Norwegian institutions will be conducted in collaboration with two Centres for Development of Institutional and Home Care Services (Rogaland County, Sogn and Fjordane County) and the municipality of Songdalen in Vest-Agder County. The Dutch research team will recruit the institutions in the Netherlands.

## Data collection methods and sources

The study is structured around five work packages (WPs) indicating distinct phases of the project. In the following, we describe the phases, data collection and sources.

Phase 1: Guide development, pilot test, and contextual mapping tool (WP1)

1  
2  
3 In phase 1, we will develop the quality and safety improvement tool – the SAFE-LEAD guide – to be  
4 used in the SAFE-LEAD intervention. This includes translation and adaptation of the QUASER Hospital  
5 Guide into Norwegian in a process involving the research team in several iterations with professional  
6 translation services, co-researchers, future users, and patient and next-of-kin representatives. The  
7 original QUASER-guide is based on empirical findings from the hospital setting and the SAFE-LEAD  
8 project will develop a version adapted to the Norwegian nursing homes and home care setting. The  
9 guide will be in one version similar for both nursing homes and home care. Possible challenges in  
10 adapting and further developing a tool, that is originally developed for hospital managers, include  
11 different management contexts, tasks, resources, knowledge level among healthcare staff, larger  
12 variety in institutional size, resources, and management levels. Therefore, the SAFE-LEAD study has  
13 designed a comprehensive development process over the first year in the project period. This  
14 development process will consist of internal workshops with the multidisciplinary research team with  
15 competence in nursing, homecare, nursing homes, quality and safety, leadership, health promotion,  
16 and human factors. There will also be workshops with co-researchers in the SAFE-LEAD partner  
17 consortium ensuring sound user involvement with perspectives from patient representatives, next-  
18 of-kin representatives, a patient and user ombudsman, and perspectives from future users of the  
19 guide (managers in primary care). To ensure that the guide fits the new context, we will conduct 3-4  
20 focus group interviews to collect input from managers in nursing homes and home care services who  
21 will have read the guide beforehand. Finally, the guide will be tested for fit and validity in one nursing  
22 home and one home care service with senior healthcare managers and their teams as part of the  
23 pilot test of the intervention (described in phase 2). The two pilot institutions are not part of the  
24 sample of eight institutions that will be recruited for the full intervention in Phase 3.

25  
26  
27  
28  
29  
30  
31  
32  
33  
34  
35  
36  
37  
38  
39  
40  
41  
42  
43  
44  
45  
46  
47  
48  
49 To facilitate implementation and use of the guide, we will also offer a web-based version. The web  
50 version will have the same content as the paper version and both the paper and the web-version will  
51 be published and publicly available for all Norwegian healthcare services, who may find it relevant,  
52 on a SAFE-LEAD website after completion of the project in 2021.

1  
2  
3 To assess the influence of contextual factors, we will develop a mapping tool for use in the  
4 implementation and evaluation phase of the project. This will be inspired by 1) Damschroder et al.'s  
5  
6 <sup>25</sup> Consolidated Framework for Implementation Research (CFIR) and McDonald's<sup>29</sup> framework for  
7  
8 considering context in quality and safety improvement interventions, 2) additional literature  
9  
10 searches, and 3) a qualitative study with 10-12 nursing home and home care managers in a variety of  
11  
12 Norwegian municipalities (large, small, rural, urban). In the interviews, we will map the contextual  
13  
14 factors of relevance for managers' work on quality and safety in nursing homes and home care. The  
15  
16 interview guide includes open questions regarding which factors managers perceive as important for  
17  
18 their work with quality and safety, and topics such as external factors, economy, and structure. The  
19  
20 tool will consider factors such as type of healthcare service (nursing home or homecare), funding,  
21  
22 geographical location, organization size, workload, and any ongoing national/regional/organizational  
23  
24 change processes.  
25  
26

#### 27 28 Phase 2: Intervention design, pilot testing, and recruitment (WP2) 29

30  
31 The Medical Research Council's guidance on developing, testing and evaluating complex  
32  
33 interventions to improve healthcare<sup>37 38</sup> will be used to design the intervention. This framework  
34  
35 views healthcare interventions as flexible, non-linear processes, giving equal attention to all process  
36  
37 phases (development, testing, evaluation, wider application). Furthermore, it stresses the  
38  
39 importance of context in implementation and allows an intervention to be adapted to its setting, to  
40  
41 better ensure its success in practice<sup>37 38</sup>. The application of an organizational perspective has been  
42  
43 suggested as an aid to understanding the contextual factors and processes that may enable or  
44  
45 impede knowledge implementation interventions in healthcare settings<sup>29 39</sup>. As the SAFE-LEAD study  
46  
47 is concerned with implementation in practice, the Organizing for Quality (OQ) framework<sup>11 40</sup> will be  
48  
49 used as a theoretical foundation in the intervention design, alongside the Consolidated Framework  
50  
51 for Implementation Research (CFIR)<sup>25</sup>. Both frameworks advocate a multi-level contextual  
52  
53 perspective on the implementation and evaluation of interventions.  
54  
55  
56  
57  
58  
59  
60

### *The SAFE-LEAD intervention*

The SAFE-LEAD intervention will be conducted in two stages over a period of one year<sup>37</sup>. Stage 1 is a training component involving action learning workshops in which managers and their teams will be able to apply the guide and conduct a self-diagnosis of their current quality and safety work. A team of experienced researchers will facilitate reflexive group discussions among the teams, which will take place in four group sessions (2-3 hours each) in all participating institutions over a six-month period. It is proposed that each group will consist of an extended management team (director of health and care services in municipality, nursing home director/director of homecare services, department managers, head nurses, nursing home physicians, and patient or next-of-kin representatives). These sessions will:

1. Introduce the guide to the participating institutions. This includes rationale, concepts, web-tool, and procedure for an internal management process for use of the guide within the organization.
2. Provide guidance for integrating patient and next of kin experiences in quality and safety improvement work.
3. Establish strategies to address the diagnosed quality and safety challenges.

In Stage 2 of the intervention, a sample of two nursing homes and two home care services (from the total sample of eight institutions) will receive a more comprehensive intervention component consisting of a close collaboration with the researchers. In addition to the training component described in Stage 1, the institutions in stage 2 will receive three site visits by researchers (1-3 days) per institution over a period of 12 months (Stage 1 + Stage 2=12 months). Activities during site visits will include:

1. A workshop to support existing and new learning arenas in quality and safety improvement work (1 day).
2. Observation of and feedback on quality and safety leadership strategy and practices (3 days).

- 1  
2  
3 3. A workshop to support the integration of patient and next-of-kin experiences in  
4  
5 improvement work (1 day).  
6

7  
8 A pilot test of the Stage 1 intervention will be conducted in one nursing home and one home care  
9  
10 services setting (not part of the sample in the full intervention in phase 3) over a three-month period  
11  
12 to test the chosen intervention contents, pedagogical approaches, and the functionality of the guide  
13  
14 developed in Phase 1. We will evaluate the pilot intervention components by means of a qualitative  
15  
16 process evaluation<sup>37 38 41</sup> involving observation in the workshops and semi-structured interviews with  
17  
18 pilot intervention participants (15-20). The pilot will not test the outcome measures. The  
19  
20 intervention will be tailored based on the pilot results.  
21

### 22 23 Phase 3: Testing and evaluating the SAFE-LEAD intervention (WP 3) 24

25  
26 In Phase 3, we will implement the intervention Stage 1 and 2. Before and during the implementation  
27  
28 process, we will map contextual factors in all participating institutions by using the context mapping  
29  
30 tool developed in Phase 1.  
31

32  
33 The SAFE-LEAD intervention is centred on the testing in practice of a research-based quality and  
34  
35 safety improvement guide for managers. The Knowledge to Action framework<sup>22</sup> will be used to guide  
36  
37 this part of the intervention. This approach proposes that the translation into practice of a research-  
38  
39 based guide requires an organisation to identify the problems it needs to solve; adapt the guide to its  
40  
41 own settings and contexts; assess and address barriers to its use; implement the intervention;  
42  
43 monitor the implementation and evaluate the outcomes<sup>42</sup>. The contents and procedures involved in  
44  
45 this phase of the SAFE-LEAD intervention will be designed and developed in close collaboration with  
46  
47 the participating user representatives in the research team, based on a reflexive, dialogue-based  
48  
49 group technique.  
50

51  
52 The evaluation of the study entails both an in-depth qualitative work to understand the process of  
53  
54 implementing the quality and safety improvement guide in practice; how the participating nursing  
55  
56  
57  
58  
59

1  
2  
3 homes and home care institutions use the guide; and a quantitative measurement of the impact of  
4  
5 the guide on quality and safety improvement knowledge and practices in these institutions.  
6

7  
8 Although the SAFE LEAD intervention is a leadership intervention designed to address leadership  
9  
10 issues, knowledge must be disseminated and applied at the clinical level (e.g., nurses and doctors) for  
11  
12 the implementation to be effective. In the evaluation of Stage 1, we will assess the relationship  
13  
14 between using the guide and changes in staffs' and managers' quality and safety knowledge,  
15  
16 attitudes and practices in all eight participating institutions. We will measure this relationship by  
17  
18 using a knowledge, attitude and practice (KAP) survey. We will conduct a literature review to identify  
19  
20 and select measurement scales for the survey questionnaire. Managers and staff in all participating  
21  
22 institutions will be invited to respond to the baseline survey questionnaire before the intervention  
23  
24 starts. A second survey questionnaire will be administered to the study participants after the Stage 1  
25  
26 intervention (after six months). The rationale is to measure changes in quality and safety knowledge,  
27  
28 attitudes and practices following the intervention program Stage 1.  
29  
30

31  
32 The purpose of intervention Stage 2 is to establish learning arenas, structures and processes to  
33  
34 support leaders' self-diagnosis of their quality and safety work, and strengthen their capacity to  
35  
36 conduct future improvement without researcher involvement. To evaluate the intervention Stage 2,  
37  
38 we will conduct a process evaluation<sup>38 41</sup>. The process evaluation will require active researcher  
39  
40 involvement in the intervention workshops. Data collection to evaluate the intervention processes in  
41  
42 each of the four institutions (Stage 2) will comprise semi-structured interviews before and after the  
43  
44 intervention period (over 12 months) with managers (approximately 5-10 x 2 depending on  
45  
46 institution size) and staff (approximately 8-10 x 2 depending on institution size), observation of the  
47  
48 intervention workshops and daily practice situations in the selected institutions (40-50 hours), as well  
49  
50 as document analysis of strategies, plans, and regulatory inspection reports. During the intervention  
51  
52 period, we will also conduct short follow-up conversations with managers participating in the  
53  
54 intervention to collect information for use in the observation and feedback sessions. This implies a  
55  
56  
57  
58  
59  
60

1  
2  
3 total of approximately 160 semi-structured interviews and 150-200 hours of observation. Interview  
4  
5 guides and observation guides have been developed for managers and healthcare professionals.  
6  
7 These guides are based on Bate et al.<sup>11</sup> and cover quality and safety challenges in terms of culture,  
8  
9 structure, enthusiasm, education, politics, external demands, physical and technical aspects, use of  
10  
11 diverse tools in improvement work, and changes to these factors over time at the managerial and  
12  
13 healthcare professional level. The study will apply NVivo to structure, categorize and analyse the  
14  
15 qualitative data according to categories relevant for quality and safety improvement challenges<sup>11</sup>.  
16  
17 Data will be analysed within cases before conducting the cross-case comparison<sup>43</sup>.  
18  
19

20 Across phase 1-3: tracer project on quality improvement in home care (WP4)

21  
22  
23 To arrive at an in-depth understanding of the role of context and leadership in daily quality  
24  
25 improvement work, we will include a tracer quality improvement project as part of the data  
26  
27 collection<sup>33</sup>. The tracer project will be studied longitudinally over the entire project period with a  
28  
29 combination of qualitative interviews, document analysis, observation, and shadowing of staff. In the  
30  
31 tracer project, we will evaluate an improvement project titled “ABCDE – systematic observation and  
32  
33 communication in community health care”. The improvement project aims at 1) developing a  
34  
35 tailored educational program designed to improve healthcare professionals` competencies and skills  
36  
37 in recognizing and responding to deteriorating frail patients, and 2) implementing new work routines  
38  
39 in the home care organizations to strengthen healthcare professionals` understanding and clinical  
40  
41 judgment of deteriorating patients. The tracer project is identified with the project partners and is  
42  
43 initiated by one of the partner municipalities. The SAFE-LEAD study will examine improvement  
44  
45 processes in real time as exemplars of how quality improvement is implemented. The tracer project  
46  
47 will enable lessons learnt, and contribute to understanding how managers are improving the  
48  
49 professional observational skills of their staff in the home care context.  
50  
51

52  
53 Phase 4: Mixed-methods synthesis, cross-country comparison, theory development (WP5)  
54  
55  
56  
57  
58  
59  
60



1  
2  
3 The SAFE-LEAD study is an opportunity to understand the meaning and impact of contextual factors  
4  
5 by analysing the influence of the quality and safety improvement guide implementation via three  
6  
7 data sets: 1) a quantitative survey of outcome measures (knowledge, attitudes, practice) across a  
8  
9 sample of eight institutions, 2) a context mapping of all participating institutions, and 3) a qualitative  
10  
11 multiple case study with a smaller sample of four institutions providing rich information on  
12  
13 leadership processes and practices, a small-scale implementation case study in the Netherlands, and  
14  
15 a tracer quality improvement project. In this sense, the study pays closer and more explicit attention  
16  
17 to multiple contextual factors<sup>44 45</sup>, and the way in which they affect the success and sustainability of  
18  
19 implementing quality and safety improvement tools.  
20

21  
22 The different data sets will be collected in parallel and analysed separately<sup>35</sup>. In Phase 4 of the study,  
23  
24 we will synthesise the results from the qualitative, quantitative, and context data sets by using a  
25  
26 procedure called “joint display of data”<sup>35</sup>. The researchers will jointly display all forms of data (e.g., in  
27  
28 tables or in NVivo) responding to similar concepts and research questions. The analysis of the total  
29  
30 amount of data in the Norwegian part of the study will compare the results from the concepts  
31  
32 measured in the KAP survey, and what is mapped by qualitative process evaluation methods, and the  
33  
34 findings from the tracer project. The outcomes of the analyses will be used to develop theoretical  
35  
36 frameworks and conceptual models of the influence of context and leadership on quality and safety  
37  
38 improvement work in primary care settings.  
39

40  
41  
42 The Norwegian results will then be compared with Dutch results from a similar small-scale research  
43  
44 project, focusing on managers’ use of different quality and safety improvement tools in general (i.e.  
45  
46 not the SAFE-LEAD guide in specific). The Dutch cases are used to contrast the nursing homes and  
47  
48 home care in Norway, as the Dutch healthcare system frequently uses a greater range of  
49  
50 improvement tools as part of managing quality and safety than the Norwegian. The cross-country  
51  
52 analysis will compare and contrast managers’ practice and competence, and whether staff members  
53  
54 make changes in their work practice to improve quality and safety of service provision. The  
55  
56  
57  
58  
59

1  
2  
3 comparison will build on a contrasting case approach <sup>43</sup> based on the differences between the  
4  
5 organisation of quality and safety work in healthcare systems in the two countries. Building on the  
6  
7 approach taken in the QUASER study<sup>33</sup>, a multilevel perspective will be used, considering important  
8  
9 macro-level contextual factors (national healthcare system), in addition to the factors identified at  
10  
11 the meso and micro levels in the case studies. We will look at effects of different contextual factors  
12  
13 such as funding frameworks, regulation, prioritisation, organisation, and competence level. National  
14  
15 differences will be analysed to better understand the effect of macro-level healthcare system factors  
16  
17 on the success of quality improvement implementation processes.  
18  
19

## 20 **ETHICS AND DISSEMINATION**

### 21 **Ethical reflections**

22  
23  
24  
25  
26 The SAFE-LEAD leadership-focused intervention targets a potential knowledge gap among managers  
27  
28 and supports their work on quality and safety improvement. The risk of negative effects on patient  
29  
30 outcomes is thus minimal. The potential of not having a positive effect of the intervention on  
31  
32 managers' leadership competence is present, but the risk of negative patient outcome due to this is  
33  
34 limited. The patient and next-of-kin perspectives are key throughout the SAFE-LEAD study. Patients  
35  
36 and next-of-kin representatives participated in the project development and will collaborate with  
37  
38 the project team as co-researchers throughout the project period. Different measures are involved  
39  
40 in the quality and safety improvement guide itself (strategies, measures) and in the intervention  
41  
42 components (workshops on use of patient experiences) to improve managers' abilities to involve  
43  
44 patient and next of kin in improvement work.  
45  
46

47  
48 The SAFE-LEAD study is approved by the Norwegian Centre for Research Data (2017/52324 and  
49  
50 54855), and exempted from ethical approval from Regional Ethical Committee because no health  
51  
52 information will be collected. The Norwegian approval also includes approval for data collection in  
53  
54 the Netherlands. The Dutch ethical approval system does not require ethical approval for research  
55  
56 projects not involving patient data, as in the SAFE-LEAD study. All participants will sign informed  
57  
58

1  
2  
3 consent and will be recruited on a voluntary basis. No patient records or other patient data will be  
4  
5 collected.

## 6 7 **Dissemination**

8  
9  
10 The SAFE-LEAD partners have agreed upon publication guidelines, a publication strategy, and a  
11  
12 publication plan. The publication strategy consists of dissemination in scientific peer-reviewed  
13  
14 journals, books and presentations at academic conferences. Moreover, there is a strategy to ensure  
15  
16 dissemination in popular science forums and in social media. The project has established a SAFE-  
17  
18 LEAD web page, a SAFE-LEAD Facebook account, newsletters, and posters. The project has an  
19  
20 international expert advisory board that will be invited annually to give input to the study and  
21  
22 contribute to the sharing of results.  
23

24  
25 The publication plan will evolve over time but includes the following planned scientific dissemination  
26  
27 activities:

- 28  
29 • Two PhD theses (authors Terese Johannessen and Torunn Strømme).
- 30  
31 • 18-20 scientific articles in a peer-reviewed special issue and in different peer-reviewed journals.
- 32  
33 • A book on Quality and Safety in Primary Care involving international contributions.
- 34  
35 • Local seminars at the study sites (including user groups).
- 36  
37 • Norway-Netherland seminar in 2020 to present final project results. Open seminar with target  
38  
39 group healthcare managers, inspection authority, researchers, user groups, professional  
40  
41 associations, governmental bodies, etc.
- 42  
43 • Special sessions at the 5th and 6th Nordic Conference on Research in Patient Safety and Quality  
44  
45 in Healthcare.
- 46  
47 • Presentations at regional, national and international conferences.
- 48  
49 • Popular science presentations in national media and healthcare magazines.

50  
51  
52 Ten primary publications are planned (see Table 1):  
53  
54

Table 1. Planned primary publications from the SAFE-LEAD study

| Articles  | Planned Scientific Article                                                                                                                                 | Main data source                                                                             |
|-----------|------------------------------------------------------------------------------------------------------------------------------------------------------------|----------------------------------------------------------------------------------------------|
| Article 1 | Improving Quality and Safety in Nursing Homes and Home Care: The study protocol of a mixed methods research design to implement a leadership intervention. | Literature<br>Policy documents<br>Scientific methods                                         |
| Article 2 | Mapping of contextual factors in nursing homes and home care - a mixed methods design.                                                                     | Literature review<br>Context mapping<br>Semi-structured interviews                           |
| Article 3 | Designing an intervention for improving leadership of quality and safety in nursing homes and home care.                                                   | Semi-structured interviews<br>Partner workshops                                              |
| Article 4 | Literature review of measurement scales of relevance for mapping quality and safety knowledge, attitudes, and practice in nursing homes and home care.     | Literature review                                                                            |
| Article 5 | Understanding the role of a leadership intervention on quality and safety leadership processes.                                                            | Process evaluation including semi-structured interviews, focus group interviews, observation |
| Article 6 | The impact of a leadership intervention on quality and safety knowledge, attitudes and practice in nursing homes and home care.                            | Quantitative data from KAP survey                                                            |
| Article 7 | Implementation of a quality and safety improvement guide and effects on quality and                                                                        | Mix:<br>KAP survey                                                                           |

|            |                                                                                                                                          |                                                             |
|------------|------------------------------------------------------------------------------------------------------------------------------------------|-------------------------------------------------------------|
|            | safety work in a nursing home context.                                                                                                   | Process evaluation<br>Context mapping                       |
| Article 8  | Implementation of a quality and safety improvement guide and effects on quality and safety work in a home care context.                  | Mix:<br>KAP survey<br>Process evaluation<br>Context mapping |
| Article 9  | The meaning of context: Comparing the implementation of a quality and safety improvement guide in the nursing home and home care context | Mix:<br>KAP survey<br>Process evaluation<br>Context mapping |
| Article 10 | Cross country comparison of working on quality and safety in Norwegian and Dutch nursing homes and home care services.                   | Mix:<br>KAP survey<br>Process evaluation<br>Context mapping |

### AUTHORS' CONTRIBUTIONS

SW and KAa applied for funding of the SAFE-LEAD study to the Research Council of Norway, (RCN), planned the study design and study protocol, and contributed to the development of the data collection tools. SW and ER drafted the manuscript, with substantial input from KAa, and revised it based on comments from all co-authors. ER contributed to the study design, development of data collection tools, and was responsible for the application for approval of the study to the Norwegian Centre for Research Data. Authors TS, TJ and MS contributed to the study design and development of data collection tools, and commented on the draft. Authors HvB and RB contributed to the study design and development of the data collection tools, commented on the draft, and are responsible

1  
2  
3 for the Dutch part of the study. Authors IAa, BU, EHR, LHT, and ATSP contributed to the study design  
4  
5 and have commented on the draft. All authors have approved the final version of the manuscript.  
6

#### 7 **FUNDING STATEMENT**

8  
9  
10 This work was supported by The Research Council of Norway (RCN) grant number 256681/H10 and  
11  
12 the University of Stavanger, Norway.  
13

#### 14 **COMPETING INTEREST**

15  
16  
17 The authors declare there are no conflict of interest.  
18  
19

#### 20 **ACKNOWLEDGEMENT**

21  
22  
23 Siri Wiig, Karina Aase, and Veslemøy Guise were responsible for the application for funding to the  
24  
25 Research Council of Norway (RCN). We wish to acknowledge the contribution from Veslemøy Guise  
26  
27 who played a key role in developing the grant application to the RCN, and to the Patient Ombudsman  
28  
29 Vestfold Torunn Grinvoll, senior representative Elsa Kristiansen, and Lene Schibeveaag in the SAFE-  
30  
31 LEAD project who have provided input to the study design and development.  
32

33  
34 The leadership guide applied in the SAFE-LEAD study is based on the results from the study *Quality*  
35  
36 *and Safety in European Union Hospitals: A Research-based Guide for Implementing Best Practice and*  
37  
38 *a Framework for Assessing Performance (QUASER)*. The QUASER project received funding from the  
39  
40 European Community's Seventh Framework Programme (FP7/2007-2013) under grant agreement  
41  
42 no. 241724. Authors Roland Bal, Hester van de Bovenkamp, Karina Aase, and Siri Wiig were all part of  
43  
44 the QUASER project from Norway and the Netherlands and contributed to writing the original guide.  
45  
46 We wish to acknowledge the other members of the QUASER team: Naomi Fulop (project manager),  
47  
48 Susan Burnett, Glenn Robert, Janet Anderson, Charles Vincent, Kathryn Charles, Susie Edwards,  
49  
50 Lisbeth Hoeg-Jensen, Heidi Poestges, and Anna Renz (England); Julia Quartz, and Anne Marie  
51  
52 Weggelaar (the Netherlands); Boel Anderson-Gäre, Pär Höglund, Tony Andersson, Anette Karlton,  
53  
54  
55  
56  
57  
58  
59  
60

Johan Calltorp, and Johan Sanne (Sweden); Francisco Nunes, Sara Gomes, and Alexandra Fernandes (Portugal); Christian von Plessen (Norway).

The authors would like to thank the two reviewers, Gunnar Tschudi Bondevik and Christine W. Hartman, for their valuable comments and input to improve the SAFE-LEAD study protocol.

## REFERENCES

1. Vincent C, Amalberti R. Safer healthcare. London: Springer Open, 2016.
2. Jha A, Prasopa-Plaizier N, Larizgoitia I, et al. Patient safety research: an overview of the global evidence. *Quality and Safety in Health Care* 2010;19(1):42-47.
3. Henriksen K, Joseph A, Zayas-Cabán T. The human factors of home health care: a conceptual model for examining safety and quality concerns. *Journal of Patient Safety* 2009;5(4):229-36.
4. Macdonald MT, Lang A, Storch J, et al. Examining markers of safety in homecare using the international classification for patient safety. *BMC health services research* 2013;13(1):191.
5. Lang A, Edwards N, Fleischer A. Safety in home care: a broadened perspective of patient safety. *International Journal for Quality in Health Care* 2008;20(2):130-35.
6. Guise V, Anderson J, Wiig S. Patient safety risks associated with telecare: a systematic review and narrative synthesis of the literature. *BMC health services research* 2014;14(1):588.
7. Wooldridge AR, Carayon P, Hundt AS, et al. SEIPS-based process modeling in primary care. *Applied Ergonomics* 2017;60:240-54.
8. Mintzberg H. *Managing the Myths of Health Care: Bridging the Separations Between Care, Cure, Control, and Community*: Berrett-Koehler Publishers 2017.
9. Oldenhof L, Oldenhof L, Stoopendaal A, et al. From boundaries to boundary work: middle managers creating inter-organizational change. *Journal of health organization and management* 2016;30(8):1204-20.
10. Parand A, Dopson S, Renz A, et al. The role of hospital managers in quality and patient safety: a systematic review. *BMJ open* 2014;4(9):e005055.
11. Bate P, Mendel P, Robert G. *Organizing for quality: the improvement journeys of leading hospitals in Europe and the United States*: Radcliffe Publishing 2008.
12. Leape L, Berwick D, Clancy C, et al. Transforming healthcare: a safety imperative. *Quality and Safety in Health Care* 2009;18(6):424-28.
13. Künzle B, Kolbe M, Grote G. Ensuring patient safety through effective leadership behaviour: A literature review. *Safety Science* 2010;48(1):1-17. doi: <http://dx.doi.org/10.1016/j.ssci.2009.06.004>
14. Glickman SW, Baggett KA, Krubert CG, et al. Promoting quality: the health-care organization from a management perspective. *International Journal for Quality in Health Care* 2007;19(6):341-48.
15. Wiig S, Storm M, Aase K, et al. Investigating the use of patient involvement and patient experience in quality improvement in Norway: rhetoric or reality? *BMC health services research* 2013;13(1):206.
16. Ministry of Health and Care Services. Meld.St. 10 (2012-2013). Kvalitet og pasientsikkerhet. . In: Services MoHaC, ed. Oslo, 2012.
17. Ministry of Health and Care Services. Meld. St. 11 (2014–2015). Kvalitet og pasientsikkerhet 2013. In: Services MoHaC, ed., 2014.
18. Wiig S, Robert G, Anderson JE, et al. Applying different quality and safety models in healthcare improvement work: Boundary objects and system thinking. *Reliability Engineering & System Safety* 2014;125:134-44.

19. Collins DB, Holton EF. The effectiveness of managerial leadership development programs: A meta-analysis of studies from 1982 to 2001. *Human resource development quarterly* 2004;15(2):217-48.
20. Amagoh F. Leadership development and leadership effectiveness. *Management Decision* 2009;47(6):989-99.
21. Tsoukas H. The firm as a distributed knowledge system: a constructionist approach. *Strategic management journal* 1996;17(S2):11-25.
22. Straus S, Tetroe J, Graham ID. Knowledge translation in health care: moving from evidence to practice. 2 ed. Oxford: Wiley Blackwell 2013.
23. Øvretveit J. Understanding the conditions for improvement: research to discover which context influences affect improvement success. *BMJ Qual Saf* 2011;20
24. Stetler CB, Ritchie JA, Rycroft-Malone J, et al. Institutionalizing evidence-based practice: an organizational case study using a model of strategic change. *Implementation Science* 2009;4(1):78.
25. Damschroder LJ, Aron DC, Keith RE, et al. Fostering implementation of health services research findings into practice: a consolidated framework for advancing implementation science. *Implementation science* 2009;4(1):1.
26. Rycroft-Malone J, Bucknall T. Models and frameworks for implementing evidence-based practice: linking evidence to action. Oxford: Wiley Blackwell 2010.
27. Shekelle PG, Pronovost PJ, Wachter RM, et al. Advancing the science of patient safety. *Annals of internal medicine* 2011;154(10):693-96.
28. Kaplan HC, Brady PW, Dritz MC, et al. The influence of context on quality improvement success in health care: a systematic review of the literature. *Milbank Q* 2010;88(4):500-59.
29. McDonald KM. Considering context in quality improvement interventions and implementation: concepts, frameworks, and application. *Academic pediatrics* 2013;13(6):S45-S53.
30. Coles E, Wells M, Maxwell M, et al. The influence of contextual factors on healthcare quality improvement initiatives: what works, for whom and in what setting? Protocol for a realist review. *Systematic Reviews* 2017;6(1):168.
31. Ministry of Health and Care Services. Meld. St. 26 (2014-2015) Fremtidens primærhelsetjeneste – nærhet og helhet. In: Services MoHaC, ed. Oslo, 2014.
32. Norwegian Board of Health Supervision. Tilsynsmelding 2013. In: helsetilsyn S, ed. Oslo, 2014.
33. Robert GB, Anderson JE, Burnett SJ, et al. A longitudinal, multi-level comparative study of quality and safety in European hospitals: the QUASER study protocol. *BMC health services research* 2011;11(1):285.
34. Fulop N. Quaser. The Hospitakl Guide. A research-based tool to reflect on and develop your quality improvement strategies: University College London; 2014 [cited 2017 13.11]. Available from: [https://www.ucl.ac.uk/dahr/pdf/study\\_documents/iQUASER\\_Hospital\\_Guide\\_291014\\_press-ready\\_cs4.pdf](https://www.ucl.ac.uk/dahr/pdf/study_documents/iQUASER_Hospital_Guide_291014_press-ready_cs4.pdf).
35. Creswell JW. Research design: Qualitative, quantitative, and mixed methods approaches: Sage publications 2013.
36. Yin R. Case study research: Design and methods 5ed. Thousand Oaks Sage 2014.
37. Craig P, Dieppe P, Macintyre S, et al. Developing and evaluating complex interventions: the new Medical Research Council guidance. *Bmj* 2008;337:a1655.
38. Moore GF, Audrey S, Barker M, et al. Process evaluation of complex interventions: Medical Research Council guidance. *bmj* 2015;350:h1258.
39. Denis J-L, Lehoux P. Organizational theory. In: Straus S, Tetroe J, Graham I, eds. Knowledge translation in health care: moving from evidence to practice. Oxford: Wiley Blackwell 2009.
40. Bergeroed I, Wiig S. Ledelse og pasientsikkerhet. (Leadership and patient safety). . In: Aase K, ed. Pasientsikkerhet-teori og praksis. 2 ed. Oslo: Universitetsforlaget 2015.
41. Patton M. Qualitative research and Evaluation Methods. 3 ed. Thousand Oaks: Sage 2002.



- 1  
2  
3 42. Harrison MB, Graham ID, Fervers B, et al. Adapting knowledge to a local context. In: Tetroe J,  
4 Graham I, eds. Knowledge translation in health care: Moving from evidence to practice.  
5 Oxford: Wiley Blackwell 2009:73-82.  
6 43. Yin R. Case study research: design and methods 3ed. Thousand Oaks Sage 2003.  
7 44. House R, Rousseau DM, Thomas-Hunt M. The Meso paradigm: A framework for the integration of  
8 micro and macro organizational behavior. *Review of Organization Behavior* 1995;17:71-114.  
9 45. Wigg S. Contributions to risk management in the public sector. PhD Thesis UiS no 48 February  
10 2008  
11  
12  
13  
14  
15  
16  
17  
18  
19  
20  
21  
22  
23  
24  
25  
26  
27  
28  
29  
30  
31  
32  
33  
34  
35  
36  
37  
38  
39  
40  
41  
42  
43  
44  
45  
46  
47  
48  
49  
50  
51  
52  
53  
54  
55  
56  
57  
58  
59  
60

For peer review only
